# 1 Complex multicellularity in fungi: evolutionary convergence, single 2 origin, or both?

3  
4 *László G. Nagy<sup>\*</sup>, Krisztina Krizsán*

5  
6 *Synthetic and Systems Biology Unit, Institute of Biochemistry, BRC-HAS, Szeged, Hungary, 62*  
7 *Temesvari krt, 6726.*

8  
9 *\*Correspondence should be addressed to L.G.N (Inagy@fun genomelab.com)*

## 11 **Abstract**

12 Complex multicellularity comprises the most advanced level of organization evolved on Earth. It  
13 has evolved only a few times in metazoans, green plants, brown and red algae and fungi.  
14 Compared to other lineages, the evolution of multicellularity in fungi follows different principles;  
15 both simple and complex multicellularity evolved via unique mechanisms not seen in other  
16 lineages. In this article we review ecological, paleontological, developmental and genomic  
17 aspects of complex multicellularity in fungi and discuss the general principles of the evolution of  
18 complex multicellularity in light of its fungal manifestations. Fungi represent the only lineage in  
19 which complex multicellularity shows signatures of convergent evolution: it appears 8-12 distinct  
20 fungal lineages, which show a patchy phylogenetic distribution, yet share some of the genetic  
21 mechanisms underlying complex multicellular development. To mechanistically explain the  
22 patchy distribution of complex multicellularity across the fungal tree of life we identify four key  
23 observations that need to be considered: the large number of apparently independent complex  
24 multicellular clades; the lack of documented phenotypic homology between these; the universal  
25 conservation of gene circuits regulating the onset of complex multicellular development; and the  
26 existence of clades in which the evolution of complex multicellularity is coupled with limited gene  
27 family diversification. We discuss how these patterns and known genetic aspects of fungal  
28 development can be reconciled with the genetic theory of convergent evolution to explain its  
29 pervasive occurrence in across the fungal tree of life.

30

31 **Key words:** multicellularity, fruiting body, convergent evolution, development, phylogenetically  
32 patchy character, mushroom, fungal reproduction, cell adhesion, gene regulatory network,  
33 fruiting body initiation

34

35 **Contents:**

36 1. *Introduction: Simple and complex multicellularity*

37 2. *Simple multicellularity in fungi*

38 3. *Complex multicellularity in fungi*

39 4. *Convergent origins of complex multicellularity in fungi*

40 5. *Evolutionary timescale for complex multicellular fungi*

41 6. *Complex multicellular functioning in fungi*

42 6.1 *Fungal development*

43 6.2 *Cell adhesion in fungi*

44 6.3 *Cell-cell communication and signaling*

45 7. *Is there a large genomic hurdle to complex multicellularity?*

46 8. *How many origins of complex multicellularity in fungi?*

47 8.1 *Homologies between independently evolved complex multicellular fungi?*

48 *Conclusions*

49

50 **1. Introduction: Simple and complex multicellularity**

51 Multicellularity comes in many forms and complexity levels, ranging from simple cell  
52 aggregations, colonies, films or filaments to the most complex organisms known(Aguilar,  
53 Eichwald & Eberl, 2015; Fairclough, Dayel & King, 2010; Herron & Nedelcu, 2015; Knoll, 2011;  
54 Niklas, 2014; Niklas & Newman, 2013b; Rainey & de Monte, 2014; Richter & King, 2013; Rokas,  
55 2008; Sebé-Pedrós, Irimia, del Campo *et al.*, 2013; Szathmary & Smith, 1995; Umen, 2014).  
56 While simple cell aggregations and colonies evolved at least 25 times in both pro- and  
57 eukaryotes(Grosberg & Strathmann, 2007; Rokas, 2008), complex multicellularity has evolved  
58 in up to five major groups, animals, embryophytes, red and brown algae(Claessen, Rozen,  
59 Kuipers *et al.*, 2014; Cock, Godfroy, Strittmatter *et al.*, 2015; Cock, Sterck, Rouze *et al.*, 2010;  
60 Knoll, 2011; Nagy; Niklas, 2014; Niklas & Newman, 2016; Sebe-Pedros, Degnan & Ruiz-Trillo,  
61 2017; Umen, 2014), and fungi. While for many groups evolving simple multicellularity seems to  
62 be relatively easy, complex multicellularity probably represents a more difficult leap for

63 organisms(Grosberg *et al.*, 2007). Simple and complex multicellularity are distinguished based  
64 on the proportion of cells being in direct contact with the environment (some vs. all), the extent  
65 of cellular differentiation, cell adhesion, communication, a developmental program and  
66 programmed cell death (PCD)(Cock *et al.*, 2010; Herron *et al.*, 2015; Knoll, 2011; Knoll &  
67 Hewitt, 2011). Complex multicellularity is usually used in reference to 3-dimensional  
68 differentiated structures, although how (and whether) it is defined varies widely across studies.  
69 Here, we focus on a genetically determined developmental program, determinate growth and 3-  
70 dimensional organization as key traits for complex multicellularity. The rationale for this is that  
71 these traits represent major hurdles to evolving higher-level complex organization, that in 3-  
72 dimensional structures not all cells are in direct contact with the environment, necessitating  
73 mechanisms for overcoming the limitations of diffusion and for cell-cell adhesion. On the other  
74 hand, primitive mechanisms for cell adhesion, communication and differentiation exist also in  
75 simple colonial and even unicellular protists(King, Hittinger & Carroll, 2003), even though they  
76 reach their highest complexity in complex multicellular organisms. Similarly, PCD occurs also in  
77 uni- and simple multicellular lineages(Herron *et al.*, 2015), so the more relevant question in the  
78 context of complex multicellularity is whether unprogrammed cell death is lethal to the  
79 multicellular individual or stalls its further development and reproduction(Knoll, 2011). It should  
80 be noted that, as is often the case in biology, discretely categorizing a continuum of evolved  
81 forms can be challenging, nevertheless, the distinction of simple and complex MC is useful for  
82 comparing phyletic and genetic patterns across distantly related multicellular groups.

83         The main focus of this review is the convergent evolution of complex multicellularity from  
84 a fungal perspective. We discuss how genetic and developmental information can be reconciled  
85 with the multiple origins of complex MC in fungi to understand its evolutionary history. We first  
86 demonstrate that complex MC is so widespread in fungi that it challenges our general view of its  
87 origins by convergent evolution. We then evaluate alternative hypotheses on the genetic  
88 mechanisms of the evolution of complex MC in fungi and how emerging theories of convergent  
89 evolution can inform our understanding of the evolution of MC. We start by introducing a  
90 concept for distinguishing simple and complex multicellular grades of fungal evolution, then  
91 discuss phylogenetic, developmental and genetic aspects of complex multicellularity in the  
92 fungal world.

## 93 **2. Simple multicellularity in fungi**

94 Multicellular organisms have diverse unicellular ancestry. Presumably, most multicellular  
95 eukaryotes evolved from aggregative or colony-forming ancestors, resembling extant

96 choanoflagellates(Fairclough *et al.*, 2010; Hanschen, Marriage, Ferris *et al.*, 2016; Richter *et al.*,  
97 2013; Sebe-Pedros *et al.*, 2017) and volvocine algae, among others(Fairclough *et al.*, 2010;  
98 Hanschen *et al.*, 2016; King, 2004; Niklas, 2014; Niklas *et al.*, 2016; Richter *et al.*, 2013; Rokas,  
99 2008; Sebe-Pedros *et al.*, 2017; Telford, Budd & Philippe). Here, the evolution of sophisticated  
100 mechanisms for cell adhesion and cell-cell communication followed by functional and  
101 morphological differentiation defines the 'classic' route to multicellularity(Brunet & King, 2017).  
102 The evolution of multicellularity in fungi departs from this classic scheme in many respects.  
103 Fungi develop multicellular thalli composed of hyphae that extend apically and grow and branch  
104 under rules similar to fractal geometry. Hyphae most likely evolved for optimizing foraging  
105 efficiency; they direct growth and occupy space to maximize substrate utilization, resulting in a  
106 loosely arranged, interconnected, fractal-like network. Hyphae are hypothesized to have  
107 evolved by the gradual elongation of substrate-anchoring rhizoids of unicellular ancestors  
108 resembling extant Chytridiomycota(Harris, 2011), although alternative routes in convergently  
109 evolved hyphal forms (e.g. Monoblepharidomycetes(Dee, Mollicone, Longcore *et al.*, 2015))  
110 may exist. Nevertheless, the evolution of fungal hyphae likely did not involve the modification of  
111 cell wall biogenesis for daughter cells to remain together, as seen in filamentous bacteria and  
112 algae(Claessen *et al.*, 2014; Herrero, Stavans & Flores, 2016; Niklas, 2014) or snowflake  
113 yeast(Ratcliff, Denison, Borrello *et al.*, 2012; Ratcliff, Herron, Howell *et al.*, 2013). The first  
114 hyphae were probably similar to those of extant Mucoromycota and gradually evolved  
115 sophisticated mechanisms for septum formation, nutrient and organelle trafficking, branch site  
116 selection, etc (for recent reviews on hyphal morphogenesis see (Harris, 2011; Lew, 2011)).  
117 Primitive hyphae were uncompartementarized coenocytic multinucleate structures where the free  
118 flow of cell content was probably hardly regulated. In modern hyphae, hyphal segments are  
119 closed off from the growing tip by septa and various septal occlusions, such as Woronin bodies,  
120 dolipores or simpler amorphous materials.

121 Thus, simple MC in fungi likely evolved via a linear process that could have avoided  
122 some of the hurdles that should be overcome for establishing an evolutionarily stable  
123 multicellular organization(Brown, Kolisko, Silberman *et al.*; Du, Kawabe, Schilde *et al.*, 2015).  
124 Hyphae might not face group conflicts and could bypass the need for fitness alignment between  
125 individual cells to directly confer a higher exported organism-level fitness, or handle conflicts at  
126 the level of individual nuclei. Fractal-like filling of the available space might further minimize  
127 conflict among separate hyphae of the same individual. Similar 'siphonous->multicellular'  
128 transformations can be found in certain algae(Niklas, Cobb & Crawford, 2013a; Niklas *et al.*,

129 2013b) and may represent a third way to evolve simple multicellularity in addition to the colonial  
130 and aggregative routes(Brown *et al.*; Brunet *et al.*, 2017; Sebé-Pedrós *et al.*, 2013).

131         However, fungal mycelia do not show all characteristics of complex MC. The growth of  
132 vegetative mycelia is indeterminate and cellular differentiation is mostly limited to asexual or  
133 sexual spores (conidia, zygo-, asco- and basidiospores, etc.) and cells involved in (a)sexual  
134 reproduction and not spatially or temporally integrated into a developmental program. Further,  
135 all cells are in direct contact with the external environment, which means that nutrient and O<sub>2</sub>  
136 uptake through diffusion is not impeded by a compact, 3-dimensional organization. Although  
137 programmed cell death is widely observed, unprogrammed cell death is not lethal to the entire  
138 organism. Thus, we consider vegetative mycelia as a grade of simple multicellularity, with noting  
139 that some species' vegetative mycelia are capable of complex functionalities and can  
140 differentiate several distinct cell types.

### 141 **3. Complex multicellularity in fungi**

142 We here define complex multicellularity as structures showing a 3-dimensional differentiated  
143 organization with a spatially and temporally integrated developmental program that grows until  
144 reaching a genetically predetermined shape and size. Complex MC in fungi is mostly discussed  
145 in the context of sexual fruiting bodies (Fig 1), although fungi produce a plethora of other  
146 complex multicellular structures, such as asexual fruiting bodies, rhizomorphs, mycorrhizae or  
147 sclerotia (Fig 2, see below). Fruiting bodies are 3-dimensional structures that enclose  
148 reproductive cells and the developing spores into a protective environment and facilitate spore  
149 dispersal both passively and actively(Dressaire, Yamada, Song *et al.*, 2016; Roper, Seminara,  
150 Bandi *et al.*, 2010). This immediately highlights the most crucial difference between fungi and  
151 other complex MC organisms. Whereas in other lineages complex MC comprises the  
152 reproducing individual, it refers to specific structure(s) of the fungal individual. Complex  
153 multicellularity in fungi fulfills mostly reproductive roles, whereas for feeding through  
154 osmotrophy, foraging for nutrients and exploration of the substrate simple multicellularity clearly  
155 represents a better adaptation. Simple and complex MC coexist in the same species in fungi.  
156 Fruiting body forming fungi undergo a transition from simple to complex multicellularity as part of  
157 their life cycle, which not only makes them unique among complex multicellular organisms, but  
158 also a potentially useful model system to study complex multicellular development.

159         Another important difference is that growth remains polarized in fruiting bodies, i.e.  
160 complex multicellular structures and organs therein are formed by the aggregation, elongation  
161 and specialization of hyphae, which has implication for the evolution of complex MC. For

162 example, there is no need for a qualitatively new mechanism for long distance distribution of  
163 nutrients or O<sub>2</sub>(Woolston, Schlaghauer, Wilkinson *et al.*, 2011), as seen in complex animals  
164 and plants. It should be noted, though, it has been hypothesized that in the most complex  
165 fruiting bodies of Basidiomycota air channels are being formed by the deposition of  
166 hydrophobins along the cell walls.

167         What is the driving force for evolving complex MC in fungi? Avoiding predation has been  
168 named as one of the factors driving the evolution of increasingly complex and larger  
169 animals(Kaiser, 2001; Knoll, 2011; Rokas, 2008). This is, however, quite unlikely as a driving  
170 force in fungi, because of their osmotrophic lifestyle and because hyphal multicellularity is  
171 sufficient to avoid the entire individual being eaten by predators. Even if much of the thallus is  
172 destroyed, the individual can completely regenerate, as long as sufficient nutrients are  
173 available(Fricker, Heaton, Jones *et al.*, 2017). The most evident selective advantage for fruiting  
174 bodies is the promotion of spore dispersal and enclosure of developing sexual propagules into a  
175 3-dimensional structure. Remarkably, both major sporogenous cell types, asci and basidia,  
176 evolved mechanisms for active spore discharge(Dressaire *et al.*, 2016; Roper *et al.*, 2010; Trail,  
177 2007). Increasing the efficiency of spore dispersal could have driven the evolution of structures  
178 that enclose and raise asci and basidia above ground level. Fruiting bodies also provide  
179 protection against infections and predation of spores, through various structural (veils, setae,  
180 hairs, spikes) and chemical defense systems. Insecticidal and antimicrobial armories are  
181 particularly rich in fruiting-body forming fungi and include secondary metabolites, pore forming  
182 toxins(Plaza, Lin, van der Velden *et al.*, 2014), lectins, many of which are encoded by genes  
183 acquired horizontally from bacteria(Kunzler, 2015).

184         In addition to sexual fruiting bodies, fungi produce a plethora of structures that conform  
185 to some to all aspects of complex multicellularity. Asexual fruiting bodies of Ascomycota  
186 (pycnidia, acervuli, sporodochia and coremia) are three dimensional reproductive structures,  
187 that harbor asexual spores (conidia). They range from submacroscopic sizes to several  
188 centimeters (Figure 2) and are made of more or less tightly arranged hyphae. Size, shape and  
189 coloration are genetically determined, but cellular differentiation is often limited to a few cell  
190 types. Pycnia, uredinia, aecia, telia (including macroscopic telial horns) are reproductive  
191 structures of rust fungi (Pucciniomycotina). Although mostly sub-macroscopic (except telial  
192 horns of *Gymnosporangium spp*), they have a predetermined developmental program and show  
193 cell differentiation and adhesion of almost isodiametric cells (Figure 2). Ectomycorrhizae,  
194 rhizomorphs and sclerotia are also three-dimensional structures(Kues, 2000), however, there  
195 might be a looser genetic control over their size and shape.



196

#### 197 **4. Convergent origins of complex multicellularity in fungi**

198 Complex multicellularity evolved in only five eukaryotic groups(Brawley, Blouin, Ficko-Blean *et*  
199 *al.*, 2017; Cock *et al.*, 2010; Niklas, 2014; Parfrey, Lahr, Knoll *et al.*, 2011; Umen, 2014). Within  
200 fungi, it occurs in most major clades and shows signs of convergent evolution(Knoll, 2011;  
201 Schoch, Sung, López-Giráldez *et al.*, 2009; Sugiyama, Hosaka & Suh, 2006; Taylor & Ellison,  
202 2010) (Fig 1). The best known complex multicellular clades are the Pezizomycotina and the  
203 Agaricomycotina in the Asco- and Basidiomycota, respectively, where the majority fruiting body  
204 forming fungi belong (Fig 1). Although generally two origins of complex multicellularity are  
205 mentioned in fungi(Knoll & Lahr, 2016; Schoch *et al.*, 2009; Stajich, Berbee, Blackwell *et al.*,  
206 2009), complex multicellular structures also occur in the early diverging Mucoromycota, the  
207 primarily yeast-like Taphrinomycotina as well as the Puccinio- and Ustilaginomycotina. Of these,  
208 the earliest diverging is the Mucoromycota, which primarily contains simple multicellular molds  
209 but also three small groups of fruiting body forming fungi. Members of the Endogonales  
210 (Mucoromycotina) form globose, truffle-like sporocarps filled with zygospores (Fig 1), while  
211 *Modicella* (Mortierellomycotina) forms small stalked fruiting bodies that contain sporangia and  
212 sporangiospores(Smith, Gryganskyi, Bonito *et al.*, 2013) (Fig 1). Similarly, several  
213 Glomeromycotina species produce small, underground sporocarps(Smith *et al.*, 2013). The  
214 Taphrinomycotina (Ascomycota) contains a single known fruiting body forming genus, *Neolecta*  
215 that forms brightly colored irregular or tongue-like fruiting bodies on soil(Nguyen, Cisse, Yun  
216 Wong *et al.*, 2017). This genus is particularly interesting from a developmental perspective as it  
217 is nested in a clade of primarily unicellular yeasts, and has a yeast-like genome  
218 architecture(Nagy; Nguyen *et al.*, 2017).

219 In the Basidiomycota, the largest fruiting body producing lineage is the Agaricomycotina,  
220 where multicellularity reached its highest complexity in fungi. Nearly all of the species produce  
221 fruiting bodies, with the exception of some secondarily reduced yeast lineages in the  
222 Tremellomycetes(Nagy, Ohm, Kovács *et al.*, 2014) or ant-associated Pterulaceae that might  
223 have lost the ability to form fruiting bodies(Mueller, 2002). This group also includes the most  
224 typical manifestations of agaricoid ‘mushroom’ morphologies as well as an array of  
225 morphologically diverse forms(Hibbett, 2007; Hibbett & Binder, 2002). Aside from the  
226 Agaricomycotina, complex multicellular species are found in the Puccinio- and  
227 Ustilaginomycotina (rust and smut fungi, respectively) as well, although they comprise the  
228 minority of species in their clades compared to simple or yeast-like species. Fruiting bodies are

229 known in at least 4 classes of the Pucciniomycotina(Aime, Matheny, Henk *et al.*, 2006)  
230 (Atractelliomycetes, Agaricostilbomycetes, Pucciniomycetes, Microbotryomycetes) and include  
231 simple capitate (*Phleogena*) or cup-shaped (*Platygløea*, *Kriegeria*, *Fig 1*) morphologies, but also  
232 crust-like (e.g. *Septobasidium*) and gelatinous (e.g. *Helicogloea*) forms resembling those found  
233 in early-diverging Agaricomycotina. As the relationships of fruiting body forming classes of the  
234 Pucciniomycotina are still unresolved(Aime *et al.*, 2006; Bauer, Begerow, Sampaio *et al.*, 2006;  
235 Wang, Groenewald, Takashima *et al.*, 2015), there is some uncertainty as to the number of  
236 independent origins of fruiting body development in this subphylum. The occurrence of true  
237 fruiting bodies in the Ustilaginomycotina may be controversial. *Ustilago maydis* was recently  
238 reported to produce fruiting body-like structures in vitro(Cabrera-Ponce, Leon-Ramirez, Verver-  
239 Vargas *et al.*, 2012) whereas other species (e.g. *Testicularia* spp., *Exobasidium* spp.) produce  
240 gall-like swellings on parasitized plants that are mostly made up of fungal hyphae but  
241 incorporate more or less of the plant tissue too. Although these show some features of complex  
242 multicellularity (e.g. tight arrangement of hyphae, adhesion), whether their development follows  
243 a genetically pre-determined program or their growth is determinate, remain to be  
244 understood(Nagy).

245 The phylogenetic distribution of complex multicellular fungi is patchy and the above  
246 mentioned lineages outline at least 8 complex multicellular clades. However, the  
247 Pucciniomycotina, Glomeromycota and potentially the Ustilaginomycotina may comprise more  
248 than a single origin of fruiting body producing species, yielding 12 as a conservative upper  
249 estimate for the number of independent complex multicellular clades in fungi, although this may  
250 need refinement as more resolved phylogenies become available.

## 251 **5. Evolutionary timescale for complex multicellular fungi**

252 Complex multicellular organisms are of vastly different ages, yet their origins and diversification  
253 might have required some basic geologic formations, eukaryotic prehistory and abiotic  
254 conditions (e.g. O<sub>2</sub> or sulfide concentrations(Canfield, Poulton & Narbonne, 2007; Canfield &  
255 Teske, 1996; Johnston, Poulton, Dehler *et al.*, 2010; Richter *et al.*, 2013)). Whereas simple  
256 multicellular lineages can be as old as 3.5 Ga(Aguilar *et al.*, 2015), complex multicellular  
257 organisms originated much later. Recent studies(dos Reis, Thawornwattana, Angelis *et al.*,  
258 2015; Parfrey *et al.*, 2011; Sharpe, Eme, Brown *et al.*, 2015) dated complex MC clades  
259 between 175 to 800 myr, with the Metazoa being the oldest (700-800 myr), followed by  
260 Florideophyceae red algae(Parfrey *et al.*, 2011; Xiao, Knoll, Yuan *et al.*, 2004) (550-720 myr),  
261 the Embryophyta (430-450 myr) and macroscopic brown algae (175 myr)(Silberfeld, Leigh,



262 Verbruggen *et al.*, 2010). Due to the soft texture of fungal fruiting bodies, the fossil record is  
263 very patchy and available fossilized fruiting bodies are way too recent to provide reasonable  
264 estimates for the age of CMC clades(Berbee & Taylor, 2010; Cai, Leschen, Hibbett *et al.*, 2017;  
265 Hibbett, Grimaldi & Donoghue, 1997; Hibbett, Binder, Wang *et al.*, 2003; Hibbett, Grimaldi &  
266 Donoghue, 1995; Poinar & Singer, 1990). Yet, the oldest known fruiting body fossil, a  
267 perithecium known as *Paleopyrenomycites devonicus*(Taylor, Hass, Kerp *et al.*, 2005) is from  
268 the early Devonian (ca. 400 myr) placing the earliest physical evidence for complex multicellular  
269 Ascomycota roughly in the same age as the origin of embryophytes or red algae. Based on this,  
270 and other Ascomycota fossils, molecular clock analyses inferred the origins of the  
271 Pezizomycotina, the largest CMC clade in fungi, at 537 (443–695) myr(Beimforde, Feldberg,  
272 Nylinder *et al.*, 2014; Prieto & Wedin, 2013). The age of the Agaricomycotina have been inferred  
273 at 429-436 myr based on multiple calibration points and phylogenomic datasets(Chang, Wang,  
274 Sekimoto *et al.*, 2015; Floudas, Binder, Riley *et al.*, 2012; Kohler, Kuo, Nagy *et al.*, 2015). To  
275 our best knowledge, no molecular age estimates are available for *Endogone* and *Modicella*,  
276 nevertheless, their limited diversity and recent divergence from simple multicellular fungi  
277 suggest they are much younger than either the Agarico- or Pezizomycotina. Similarly, although  
278 chronological information is lacking for complex multicellular Puccinio-, Ustilaginomycotina and  
279 Taphrinomycotina, the patchy distribution of complex MC taxa in these clades suggests  
280 relatively recent origins. Taken together, the origins of the Pezizomycotina and Agaricomycotina  
281 seem to coincide with the origins of complex multicellular plants and algae in the Paleozoic,  
282 although significantly older estimates have, however, also been published(Berbee *et al.*, 2010;  
283 Heckman, Geiser, Eidell *et al.*, 2001). The much younger ages for smaller complex multicellular  
284 clades suggests that the evolution of complex MC in fungi is not tied to specific geologic events,  
285 as suggested for animals(Rokas, 2008), but was probably dependent on internal contingencies.

## 286 **6. Complex multicellular functioning in fungi**

287 How complex multicellularity manifests during fruiting body development has been of interest  
288 among mycologists for a long time. Information based on mutant screens and classical genetic  
289 techniques (Kues, 2000; Pöggeler, Nowrousian & Kück, 2006) is being increasingly  
290 complemented by high throughput studies based on whole genomes sequencing and RNA-Seq  
291 (Nowrousian, 2014). Studies involving whole transcriptome comparisons (Table 2) have  
292 revealed important principles of fruiting body development in both model and non-model fungal  
293 species. It is becoming evident, that in terms of morphogenesis and function, there are also a  
294 number of similarities and differences between fungi and other complex MC clades. In the

295 following sections we therefore discuss known patterns of development, cell adhesion and  
296 signaling in complex multicellular fungi, with special emphasis on the general principles.

## 297 **6.1 Fungal development**

298 Fungi are unique among complex multicellular organisms in that they can switch between  
299 simple and complex multicellularity during their life cycle. While the vegetative mycelium is  
300 composed of indeterminately growing hyphae that rarely adhere to each other, fruiting body  
301 development is a genetically predetermined process that involves adhesion, cell differentiation,  
302 growth, programmed cell death and senescence. It starts with a transition from a fractal-like  
303 growing vegetative mycelium to a 3-dimensional hyphal aggregate through intense localized  
304 hyphal branching and adhesion(Kues, 2000; Lakkireddy, Navarro-González, Velagapudi *et al.*,  
305 2011; Lichius, Lord, Jeffree *et al.*, 2012; Pöggeler *et al.*, 2006) (Fig. 4). In the Basidiomycota,  
306 this aggregate is known as the primary hyphal knot. In the Ascomycota, development has been  
307 most widely studied in perithecium-forming Sordariomycetes (e.g. *Sordaria*, *Neurospora*), where  
308 the earliest complex multicellular stage is the protoperithecium (Fig. 4). The development of the  
309 hyphal knot and the protoperithecium involves the reprogramming of hyphal branching patterns  
310 to form the first step of complex MC. Subsequently, the differentiation of major tissue types  
311 takes place in secondary hyphal knots and perithecia in the Basidio- and Ascomycota,  
312 respectively. It has been estimated that perithecia can differentiate up to 13 cell types(Lord &  
313 Read, 2011), respectively, although the actual number of cell types, especially in the  
314 Basidiomycota, might be significantly higher.

315 The development of mature fruiting bodies follows genetically encoded programs that  
316 determine the species-specific morphologies(Kamada, 2002; Kamada, Sano, Nakazawa *et al.*,  
317 2010; Kues, 2000; Pöggeler *et al.*, 2006; Trail & D.M., 2014), followed by senescence through  
318 the action of various oxidative (laccases, phenol oxidases), cell-wall degrading enzymes and  
319 tyrosinases, among others(Moore, 2005; Sakamoto, Nakade, Konno *et al.*, 2017). This is similar  
320 to death in other complex multicellular lineages and putatively serves the purpose of giving way  
321 to new reproducing generations of fruiting bodies and possibly recycling of cellular components  
322 towards reproductive cells(Moore, 2005). Growth remains apical even within fruiting bodies, but  
323 cell shape is extensively modified, ranging from hyphal to inflated and even isodiametric or  
324 polyhedral (referred to as conglutinate cells in *Sordaria*(Lord *et al.*, 2011)), similar to animal and  
325 plant cells. Nonterminal cells might form side-branches, but regions of cell proliferation,  
326 resembling that in animals, to our best knowledge do not exist. Following a wave of cell

327 differentiation events, growth in fruiting bodies is achieved by manipulating cell size through  
328 turgor and cell wall expansion.

329         There is evidence for autophagic cell death playing a role in sculpting fruiting bodies of  
330 both the Asco- and Basidiomycota. It should be noted that PCD of non-terminal cells may be  
331 counter-selected in fruiting body development, because it disrupts nutrient transport along the  
332 hyphae. Nevertheless, PCD has been reported to play a role in forming the gill cavity of  
333 *Agaricus bisporus*(Lu, 2006; Umar & van Griensven, 1998) (although this has been disputed)  
334 and in removing paraphyses from within ascomycete perithecia, presumably to give way to asci  
335 and spore release(Trail *et al.*, 2014). Further, autophagy genes are required for fruiting body  
336 development in *Sordaria macrospora*(Voigt, Herzog, Jakobshagen *et al.*, 2013; Voigt &  
337 Pöggeler, 2013), although how their defects disrupt development is not known yet.

## 338 **6.2 Cell adhesion in fungi**

339 Most of our knowledge on adhesive proteins of fungi pertains to adhesion to animal and plant  
340 hosts and various surfaces (e.g. medical devices) and comes primarily from simple multicellular  
341 and secondarily unicellular (i.e. yeast) species. Adhesion is mediated by a combination of sticky  
342 cell wall proteins and secreted carbohydrates, although the precise composition of fungal  
343 adhesives is very heterogeneous(de Groot, Bader, de Boer *et al.*, 2013; Epstein & Nicholson,  
344 2016; Tucker & Talbot, 2001). Most cell wall proteins with glycosylphosphatidylinositol (GPI)  
345 anchoring(de Groot *et al.*, 2013; Sundstrom, 2002) to the cell wall have adhesive  
346 properties(Dranginis, Rauceo, Coronado *et al.*, 2007; Weig, Jansch, Gross *et al.*, 2004) and  
347 include adhesins(Sundstrom, 1999; Sundstrom, 2002; Weig *et al.*, 2004), flocculins(Dranginis *et*  
348 *al.*, 2007) and sexual agglutinins(Lipke & Kurjan, 1992) that participate in the adhesion of yeast  
349 cells to each other and to various surfaces. Other adhesive molecules include  
350 glycoproteins(Newey, Caten & Green, 2007) that are linked to cell wall sugars through N- or O-  
351 linked oligosaccharides(Bowman & Free, 2006) (mostly mannose or galactomannan) and  
352 secreted mannosyl and glucosyl residues. Although not much is known about the role and  
353 composition of the extracellular matrix in complex multicellular fungi, ECM deposition has been  
354 observed already in the earliest stages of fruiting body development(Lichius *et al.*, 2012).

355         Our understanding of cell adhesion within fruiting bodies is far from complete(Lord *et al.*,  
356 2011; Trail *et al.*, 2014), nevertheless, many of the adhesive proteins described from simple  
357 multicellular fungi have been detected in fruiting bodies. GPI-anchored and fasciclin-like  
358 proteins(Liu, Chen, Min *et al.*, 2009; Miyazaki, Kaneko, Sunagawa *et al.*, 2007) have been  
359 implicated in cell adhesion within fruiting bodies(Trail, 2013), whereas hydrophobins have been

360 suggested to form air channels and thus could help circumventing the limits of diffusion in 3-  
361 dimensional structures(Lugones, Wösten, Birkenkamp *et al.*, 1999). Similarly, lectins have been  
362 detected in fruiting bodies of Asco- and Basidiomycota, and might be involved in cell  
363 adhesion(Hassan, Rouf, Tiralongo *et al.*, 2015) but also in defense against predators(Hassan *et al.*  
364 *et al.*, 2015). These families are conserved across the Asco- and Basidiomycota at the family level  
365 which consistent with both vertical inheritance of function and their parallel co-option for hypha-  
366 hypha adhesion in complex MC lineages. This would parallel adhesive molecules of complex  
367 animals having presumably evolved early in protist evolution for prey capture and later co-opted  
368 for cell-cell adhesion(Abedin & King, 2008; Abedin & King, 2010; King *et al.*, 2003; Richter *et al.*,  
369 2013; Rokas, 2008).

### 370 **6.3 Cell-cell communication and signaling**

371 Multicellular organisms mediate transcriptional responses to external stimuli and synchronize  
372 cell functioning by various signal transduction pathways both within and between cells(de  
373 Mendoza, Sebé-Pedrós & Ruiz-Trillo, 2014; King, 2004; King *et al.*, 2003; Miller, 2012).  
374 Because of how cells arise in fungi, communication along and between hyphae necessarily  
375 follows different principles. There are well-understood mechanisms for information processing  
376 along hyphae in vegetative mycelia, whereas there is no functional analogue of plasmodesmata  
377 or gap junctions that would mediate crosstalk between neighbouring(Bloemendal & Kuck, 2013)  
378 hyphae in fruiting bodies. Intercellular communication in fungi relies on the diffusion of chemical  
379 signals through the extracellular space, such as pheromones, volatile compounds, quorum  
380 sensing molecules(Albuquerque & Casadevall, 2012; Cottier & Mühlischlegel, 2012; Wongsuk,  
381 Pumeesat & Luplertlop, 2016) or even small proteins(Gyawali, Upadhyay, Way *et al.*, 2017;  
382 Wang, Tian, Gyawali *et al.*, 2013). It has evolved to signal through a loosely occupied space or  
383 among unicells, that primarily and suits the needs of vegetative mycelium or yeast cells.  
384 Nonetheless, such systems could be easily co-opted to communicate across tightly arranged  
385 hyphae in fruiting bodies, as suggested by a higher diversity(Busch & Braus, 2007; Frey,  
386 Reschka & Poggeler, 2015; Kuck, Beier & Teichert, 2016; Pöggeler *et al.*, 2006; Stajich, Wilke,  
387 Ahren *et al.*, 2010) of certain kinase gene families in fruiting body forming fungi, the expression  
388 of several kinases in fungal fruiting bodies and defects in fruiting body development in many  
389 kinase mutants(Pöggeler *et al.*, 2006). Remarkably, defects in either of the three MAP kinase  
390 pathways of fungi (OS, CWI and PG-MAPK pathways) impact fruiting body initiation(Kicka &  
391 Silar, 2004; Lichius *et al.*, 2012). Although the precise mechanisms of interhyphal  
392 communication within fruiting bodies have remained unknown so far, the lack of intercellular

393 channels between neighboring hyphae suggest that fungi use different strategies to orchestrate  
394 the functioning of complex multicellular structures compared to plants and animals.

## 395 **7. Is there a large genomic hurdle to complex multicellularity?**

396 Although a complete understanding of MC-related genetic elements is lacking for any lineage,  
397 the significant the increases in phenotypic complexity associated with the evolution of complex  
398 multicellularity suggested the necessity of a comparably large set of genetic novelties(Cock *et al.*,  
399 *et al.*, 2010; Knoll, 2011). It would also accord well with it being a rare event in evolution. Genetic  
400 innovations underpinning the evolution of multicellularity have mostly been discussed in the  
401 context of gene duplications(Brawley *et al.*, 2017; Brunet *et al.*, 2017; Cock *et al.*, 2010; Miller,  
402 2012; Richter *et al.*, 2013; Rokas, 2008; Sebe-Pedros *et al.*, 2017; Stajich *et al.*, 2010) and to a  
403 lesser extent in other sources of genetic novelty. In fungi, a number of transitions to complex  
404 multicellularity are coupled with surprisingly limited gene family diversification. The genus  
405 *Neolecta* (Taphrinomycotina) and fruiting body forming members of the Tremellomycetes and  
406 Pucciniomycotina, possess small genomes with a secondarily reduced protein coding capacity,  
407 similar to that of secondarily unicellular yeasts(Nagy; Stajich *et al.*, 2010). Consistent with an  
408 independent origin of complex multicellularity, *Neolecta* is nested in a clade of yeast-like and  
409 simple multicellular fungi (Taphrinomycotina) (Fig 5), which, we estimate, split from its closest  
410 extant complex MC relative >500 million years ago (based on ref(Kohler *et al.*, 2015)). Yet, its  
411 genome encodes as few as 5500 protein-coding genes (fewer than that of *Saccharomyces*) and  
412 very limited gene family diversification has been inferred along the evolutionary route to  
413 *Neolecta*(Nguyen *et al.*, 2017). This is consistent with three hypotheses. First, the genetic hurdle  
414 to complex multicellularity may not be big and it may be relatively 'easy' for fungi to evolve  
415 complex multicellular structures. Second, gene duplications might not be the key changes  
416 underlying the evolution of complex multicellularity. Rather, building on a conserved gene  
417 repertoire shared with other Ascomycota, other sources of genetic innovations (e.g. gene  
418 regulatory network rewiring, alternative splicing patterns, noncoding RNA species, etc..) could  
419 underlie the independent origin of fruiting bodies in *Neolecta*, similarly to the picture that started  
420 to emerge from studies of animal multicellularity(Grau-Bove, Torruella, Donachie *et al.*, 2017;  
421 Richter *et al.*, 2013; Sebe-Pedros *et al.*, 2017). Third, a single origin of fruiting bodies in the  
422 Ascomycota could explain the limited gene family diversification on the evolutionary path  
423 leading to *Neolecta*, but would not explain the lack of known fruiting body genes of the  
424 Pezizomycotina from its genome. Phylogenetically it would also be a quite unparsimonious  
425 scenario, requiring several losses of fruiting body production in the Taphrinomycotina and the



426 Saccharomycotina, among others. Which of these, or their combination explain best the  
427 evolution of complex MC in *Neolecta* and other fungi, in general, remains to be understood.

## 428 **8. How many origins of complex multicellularity in fungi?**

429 Complex multicellularity in fungi is a typical patchy(Telford *et al.*) character that appears in many  
430 phylogenetically distant clades. The prevailing view is that fungal fruiting bodies arose through  
431 convergent evolution(Knoll, 2011; Schoch *et al.*, 2009; Sebe-Pedros *et al.*, 2017; Stajich *et al.*,  
432 2009; Taylor *et al.*, 2010), which is supported by the apparent lack of homologies between  
433 fruiting bodies in different clades. We above discussed 8 major clades of complex multicellular  
434 fungi (Fig 1), although there might be as many as 12, depending on the number of independent  
435 fruiting body forming clades in the Pucciniomycotina. If all of these clades evolved complex  
436 multicellularity independently, it means that there are 8-12 origins of this trait within fungi,  
437 compared to only four outside fungi. The large number and density of complex multicellular  
438 clades, however, prompts us to examine alternative views on the origin of complex MC in fungi.  
439 How would models implying a single origin of complex MC compare to ones implying multiple  
440 origins? Phylogenetically, the multiple origins model is more parsimonious than the single origin  
441 model, requiring 8-12 origins compared to 1 origin and >16 losses to explain the distribution of  
442 complex multicellularity across fungi (Fig. 3). However, purely phylogenetic considerations have  
443 little power to evaluate evolutionary hypotheses as the likelihood of the recurrent evolution of  
444 multigenic traits might be orders of magnitudes lower than that of a single origin followed by  
445 multiple losses. Therefore, in the following section we discuss how the phylogenetic  
446 conservation of developmental modules, genes and pathways underlying fruiting body  
447 development fits alternative scenarios of the evolution of complex MC in fungi.

### 448 **8.1 Homologies between independently evolved complex multicellular fungi?**

449 If complex multicellular structures in disparate clades share homology, it should be detectable  
450 among genes involved in fruiting body development in the Asco- and Basidiomycota. Fruiting  
451 bodies in these clades show no evident homology at the phenotype level, however, this comes  
452 at no surprise as phenotypes can diverge quickly and so a more appropriate question is whether  
453 homologies exist at the level of the underlying genetic background. Some Asco- and  
454 Basidiomycota fruiting bodies comprise the best researched complex multicellular structures of  
455 fungi and the model species are as distant phylogenetically as any two complex multicellular  
456 clades are. In particular, are there homologies at the level of interactions high in the gene



457 regulatory networks (including the initiation of the complex multicellular phase) and the key  
458 cellular functions of complex MC (adhesion, communication, development)?

459         The development of complex multicellular structures is part of the sexual reproductive  
460 program in fungi. In the most general sense, sexual reproduction, including mate detection, cell  
461 fusion and the formation of sexual propagules, and many of the associated genetic pathways  
462 are conserved across fungi. Fruiting bodies evolved to protect the developing sexual progeny  
463 and thus any gene regulatory network orchestrating their development should be plugged into  
464 the pathways governing sexual development. Indeed, mating genes regulate several aspects of  
465 fruiting body development: the formation of fruiting body initials (protoperithecia) of the  
466 Ascomycota, and that of primary and secondary hyphal knots of *Coprinopsis cinerea* are  
467 regulated by the *A* and *B* mating-type genes (Kues, Granado, Hermann *et al.*, 1998; Kues,  
468 Walser, Klaus *et al.*, 2002). On the other hand, protoperithecia of *Neurospora crassa* appear in  
469 a mating-independent manner, before fertilisation by a conidium of opposite mating type  
470 happens. Both protoperithecium and primary hyphal knot formation are induced by nutrient  
471 (mostly N<sub>2</sub>) starvation (Pöggeler *et al.*, 2006) through mechanisms that are widely conserved  
472 across fungi (D'Souza & Heitman, 2001; López-Berges, Rispaill, Prados-Rosales *et al.*, 2010;  
473 Shertz, Bastidas, Li *et al.*, 2010) (Fig. 4) and even deeper in the eukaryotes (*e.g.*  
474 *Dictyostelium* (Dubravcic, van Baalen & Nizak, 2014)). More generally, nutrient availability is an  
475 important signal for sex in fungi: nutrient sensing pathways regulate sexual development  
476 through the mating type genes (Lengeler, Davidson, D'Souza *et al.*, 2000), similarly to many  
477 other processes that impact fruiting body development.

478         The initiation of the complex multicellular phase is dependent on a number of additional  
479 factors, such as changing environmental variables (*e.g.* temperature, CO<sub>2</sub> concentration) and  
480 the perception of external signals, such as light, by the vegetative mycelium. Light sensing  
481 relays several important processes of fruiting body development, including its initiation,  
482 maneuvering growth into the right direction and sensing seasonal light/dark periodicity that  
483 triggers fruiting (Kamada *et al.*, 2010; Pöggeler *et al.*, 2006). Many of these responses are  
484 mediated by the blue light receptor white collar complex (WCC), which, including its regulatory  
485 role in fruiting body development is conserved widely (Idnurm & Heitman, 2005; Rodriguez-  
486 Romero, Hedtke, Kastner *et al.*, 2010; Verma & Idnurm, 2013), although the specific interaction  
487 may differ even between closely related species (Kim, Kim, Lee *et al.*, 2015; Purschwitz, Müller,  
488 Kastner *et al.*, 2008). The WCC complex regulates sexual reproduction through mating  
489 genes (Idnurm *et al.*, 2005) in all fungal species examined so far (Idnurm & Heitman, 2010),  
490 except for budding and fission yeasts in which the complex has been lost (Nguyen *et al.*, 2017).

491 Similarly, the gross structure of mating pathways, that of mating loci and the regulation of sexual  
492 reproduction by mating genes is conserved across the Dikarya (Asco- and Basidiomycota) and  
493 maybe even earlier fungi(Casselton, 2002; Jones & Bennett, 2011; Kim, Wright, Park *et al.*,  
494 2012; Raudaskoski & Kothe, 2010). G-proteins and the mitogen-activated protein kinase  
495 cascade that transduces the signal of compatible mate partner to the nucleus are also highly  
496 conserved across fungi(Ait Benkhali, Coppin, Brun *et al.*, 2013; Jones *et al.*, 2011; Kruzel, Giles  
497 & Hull, 2012), although differences between species exist at the level of terminal transcription  
498 factor identity(Kruzel *et al.*, 2012). Other two MAP kinase pathways (cell wall integrity and  
499 osmoregulatory) are also highly conserved across fungi and required for fruiting body  
500 development(Lichius *et al.*, 2012). The velvet complex coordinates differentiation processes and  
501 influences (a)sexual fruiting body development. Velvet complex proteins originated before the  
502 last common ancestor of complex multicellular lineages and are conserved across most  
503 fungi(Bayram & Braus, 2012) (Fig. 4).

504 On the other hand, little is known about the conservation of effector genes and cellular  
505 differentiation pathways (e.g. genes involved in morphogenesis, differentiation, etc.) that  
506 implement the complex multicellular phase. Adhesion-related GPI anchored proteins as well as  
507 hydrophobins are conserved across all fungi and are involved in fruiting body development in  
508 both the Asco- and Basidiomycota(Bruneau, Magnin, Tagat *et al.*, 2001; Costachel, Coddeville,  
509 Latge *et al.*, 2005; Robledo-Briones & Ruiz-Herrera, 2013; Szeto, Leung & Kwan, 2007).  
510 However, given their different roles in simple multicellular and yeast species, whether their  
511 widespread role in fruiting body development evolved through parallel co-option or reflects a  
512 plesiomorphic condition is difficult to decide. Similarly, lectins have been implicated in adhesion  
513 and defense in both the Asco- and Basidiomycota fruiting bodies(Hassan *et al.*, 2015), although  
514 different clades (and often different species) made use of different lectin families.

515 The lack of discernible homology among known genetic aspects downstream of fruiting  
516 body initiation implies extensive convergence. This is underpinned by the fact that most  
517 transcription factors known to be involved in fruiting body morphogenesis are specific to either  
518 the Asco- or Basidiomycota, although conservation of function in sexual reproduction has been  
519 reported at the family level (e.g. HMG-box TF-s)(Ait Benkhali *et al.*, 2013), which might suggest  
520 a plesiomorphic role on cell differentiation or that certain functions tend to be recruited  
521 repeatedly for fruiting body development.

522 Taken together, the genetic toolkit of fruiting body development includes both universally  
523 conserved and lineage-specific elements, which suggests it has been assembled gradually  
524 during evolution. Whereas many aspects of fruiting body development show convergence,

525 homology exists among regulatory gene circuits underlying the initiation of fruiting body  
526 development and might exist at the level of certain multicellular functionalities. This points to a  
527 single origin of some of the foundations of complex multicellularity in fungi, which is remarkable  
528 from the perspective of independent origins and raises the question of how conservation can be  
529 reconciled with genetic theories of convergent evolution.

530         Explaining phenotypic convergence is a major challenge in evolutionary biology.  
531 Convergence in the classic sense implies the lack of homology, although recent advances  
532 revealed that this concept does not hold for several convergently evolved traits and suggests  
533 that a more detailed view on evolutionary convergence is necessary(Gompel & Prud'homme,  
534 2009; Nagy *et al.*, 2014; Prud'homme, Gompel & Carroll, 2007; Stern, 2013). Phenotypic  
535 convergence can arise as a result of a range of genetic processes that include contributions of  
536 both homology and homoplasy(Nagy *et al.*, 2014; Panganiban, Irvine, Lowe *et al.*, 1997; Shubin,  
537 Tabin & Carroll, 2009; Wake, Wake & Specht, 2011) (convergence/parallelism). Fruiting body  
538 formation is a complex developmental process, and its current manifestations in both the Asco-  
539 and Basidiomycota probably evolved in a gradual manner. Similarly, gene regulatory circuits  
540 that orchestrate fruiting body development certainly also evolved in a stepwise manner, building  
541 on ancient regulatory modules, but also on co-option of conserved genes and the evolution of  
542 new ones (Fig. 5). At the moment relevant information to precisely reconstruct the evolution of  
543 the genetic toolkits underlying Asco- and Basidiomycota fruiting bodies and to answer the  
544 question whether their ancestor (or even earlier ones) was capable of forming simple fruiting  
545 bodies is lacking. Nevertheless, the high phylogenetic density of complex MC clades and the  
546 conservation of some mechanisms on fruiting body development suggests that convergence in  
547 the strict sense may not adequately explain the evolution of complex MC in fungi.

548 Understanding the components and conservation of early developmental modules that  
549 physically implement complex MC, downstream of the initiation of fruiting body development,  
550 thus, in our opinion, represents the key question for understanding the number of origins of  
551 complex multicellularity in fungi.

552

## 553 **Conclusions**

554 (1) Fungi are one of the most enigmatic lineages of complex multicellular organisms.  
555 Although functional and mechanistic similarities with plant and animal multicellularity exist, there  
556 are fundamental differences in the driving forces, the timing and mechanisms of the evolution of  
557 simple and complex multicellularity in fungi, suggesting that there might be no unifying

558 framework for the evolution of multicellularity across the tree of life. Is it possible then to  
559 establish general principles of the evolution of multicellularity? In terms of complex MC, there is  
560 certainly a common syndrome of traits that distinguish complex from simple multicellularity. This  
561 includes 3-dimensional organization, cell adhesion and an integrated developmental program  
562 that results in a multicellular structure or individual with genetically determined size and shape.  
563 For most lineages, complex MC comprises the reproducing individual, whereas it serves mostly  
564 reproductive roles in fungi. This is a fundamental difference between fungi and other lineages  
565 and provides an adaptive explanation for the patchy phylogenetic distribution of complex  
566 multicellularity in fungi.

567 (2) Complex multicellular fungi fall into 8-12 clades. This recurrence is currently considered  
568 to have happened through convergent evolution. While the genetic bases of several key aspects  
569 (e.g. morphological) of complex MC are lineage-specific and thus likely evolved convergently,  
570 most mechanisms of fruiting body initiation are universally conserved and thus likely have a  
571 single origin in fungi. How did morphogenetic processes that link the conserved and lineage-  
572 specific developmental modules evolve is among the least known aspects of fruiting body  
573 development currently, yet these might represent the crux of the matter for understanding the  
574 origins of complex multicellularity in fungi. Whether a single or multiple origins can explain the  
575 patchy phylogenetic distribution of complex multicellularity in fungi will need further research  
576 and we conjecture that focusing on the earliest cell-differentiation events in the development of  
577 complex multicellular structure holds the key to answering this question.

578 (3) Complex MC can be encoded by very small, yeast-like genomes, suggesting that  
579 complex MC does not require a great deal more genes than the development of simple  
580 multicellular fungi or yeasts. Protein coding repertoires of fungal genomes fail to adequately  
581 explain differences in complexity level, and call for assays of other sources of genetic  
582 innovations(Nagy), including gene regulatory network rewiring, alternative splicing, various non-  
583 coding RNA species or RNA-editing pathways(Teichert, Dahlmann, Kuck *et al.*, 2017).  
584 Uncovering the genetic underpinnings of the evolution of complex MC in fungi is key to  
585 understanding the general principles of evolution towards increasingly more complex  
586 organisms. Our views on evolutionary trends towards complex MC in the tree of life and whether  
587 it represents a major transition in terms of genetic novelty hinges to a large extent on what we  
588 have learned and are about to learn through fungi. We expect that the unique ways of fungi for  
589 multicellular functioning could change paradigms in one of the central questions in biology.

590  
591

## 592 **Acknowledgements**

593 The authors appreciate fruitful discussions with Gábor M. Kovács on questions related to this  
594 review. The authors were supported by the Momentum Program of the Hungarian Academy of  
595 Sciences (LP2014/12) and ERC\_HU Grant #118722 from the NRD Office.

596

## 597 **References**

598 ABEDIN M. & KING, N. (2008). The premetazoan ancestry of cadherins. *Science* **319**, 946-8.

599 ABEDIN M. & KING, N. (2010). Diverse evolutionary paths to cell adhesion. *Trends Cell Biol* **20**,  
600 734-42.

601 AGUILAR C., EICHWALD, C. & EBERL, L. (2015). Multicellularity in bacteria: from division of labor  
602 to biofilm formation. In *Evolutionary Transitions to Multicellular Life: Principles and*  
603 *mechanisms* (ed. I. Ruiz-Trillo and A. M. Nedelcu), pp. 129-152. Springer Netherlands,  
604 Dordrecht.

605 AIME M. C., MATHENY, P. B., HENK, D. A., FRIEDERS, E. M., NILSSON, R. H., PIEPENBRING, M.,  
606 MCLAUGHLIN, D. J., SZABO, L. J., BEGEROW, D., SAMPAIO, J. P., BAUER, R., WEIß, M.,  
607 OBERWINKLER, F. & HIBBETT, D. (2006). An overview of the higher level classification of  
608 Pucciniomycotina based on combined analyses of nuclear large and small subunit rDNA  
609 sequences. *Mycologia* **98**, 896-905.

610 AIT BENKHALI J., COPPIN, E., BRUN, S., PERAZA-REYES, L., MARTIN, T., DIXELIUS, C., LAZAR, N.,  
611 VAN TILBEURGH, H. & DEBUCHY, R. (2013). A Network of HMG-box Transcription Factors  
612 Regulates Sexual Cycle in the Fungus *Podospira anserina*. *PLOS Genetics* **9**,  
613 e1003642.

614 ALBUQUERQUE P. & CASADEVALL, A. (2012). Quorum sensing in fungi – a review. *Medical*  
615 *mycology* **50**, 337-345.

616 BAUER R., BEGEROW, D., SAMPAIO, J. P., WEIB, M. & OBERWINKLER, F. (2006). The simple-  
617 septate basidiomycetes: a synopsis. *Mycological Progress* **5**, 41-66.

618 BAYRAM O. & BRAUS, G. H. (2012). Coordination of secondary metabolism and development in  
619 fungi: the velvet family of regulatory proteins. *FEMS Microbiol Rev* **36**, 1-24.

620 BEIMFORDE C., FELDBERG, K., NYLINDER, S., RIKKINEN, J., TUOVILA, H., DÖRFELT, H., GUBE, M.,  
621 JACKSON, D. J., REITNER, J., SEYFULLAH, L. J. & SCHMIDT, A. R. (2014). Estimating the  
622 Phanerozoic history of the Ascomycota lineages: Combining fossil and molecular data.  
623 *Molecular Phylogenetics and Evolution* **78**, 386-398.

624 BERBEE M. L. & TAYLOR, J. W. (2010). Dating the molecular clock in fungi – how close are we?  
625 *Fungal Biology Reviews* **24**, 1-16.

- 626 BLOEMENDAL S. & KUCK, U. (2013). Cell-to-cell communication in plants, animals, and fungi: a  
627 comparative review. *Naturwissenschaften* **100**, 3-19.
- 628 BOWMAN S. M. & FREE, S. J. (2006). The structure and synthesis of the fungal cell wall.  
629 *BioEssays* **28**, 799-808.
- 630 BRAWLEY S. H., BLOUIN, N. A., FICKO-BLEAN, E., WHEELER, G. L., LOHR, M., GOODSON, H. V.,  
631 JENKINS, J. W., BLABY-HAAS, C. E., HELLIWELL, K. E., CHAN, C. X., MARRIAGE, T. N.,  
632 BHATTACHARYA, D., KLEIN, A. S., BADIS, Y., BRODIE, J., CAO, Y., COLLÉN, J., DITTAMI, S.  
633 M., GACHON, C. M. M., GREEN, B. R., KARPOWICZ, S. J., KIM, J. W., KUDAHL, U. J., LIN, S.,  
634 MICHEL, G., MITTAG, M., OLSON, B. J. S. C., PANGILINAN, J. L., PENG, Y., QIU, H., SHU, S.,  
635 SINGER, J. T., SMITH, A. G., SPRECHER, B. N., WAGNER, V., WANG, W., WANG, Z.-Y., YAN,  
636 J., YARISH, C., ZÄUNER-RIEK, S., ZHUANG, Y., ZOU, Y., LINDQUIST, E. A., GRIMWOOD, J.,  
637 BARRY, K. W., ROKHSAR, D. S., SCHMUTZ, J., STILLER, J. W., GROSSMAN, A. R. &  
638 PROCHNIK, S. E. (2017). Insights into the red algae and eukaryotic evolution from the  
639 genome of *Porphyra umbilicalis* (Bangiophyceae, Rhodophyta). *Proceedings of the*  
640 *National Academy of Sciences* **114**, E6361-E6370.
- 641 BROWN MATTHEW W., KOLISKO, M., SILBERMAN, JEFFREY D. & ROGER, ANDREW J. Aggregative  
642 Multicellularity Evolved Independently in the Eukaryotic Supergroup Rhizaria. *Current*  
643 *Biology* **22**, 1123-1127.
- 644 BRUNEAU J. M., MAGNIN, T., TAGAT, E., LEGRAND, R., BERNARD, M., DIAQUIN, M., FUDALI, C. &  
645 LATGE, J. P. (2001). Proteome analysis of *Aspergillus fumigatus* identifies  
646 glycosylphosphatidylinositol-anchored proteins associated to the cell wall biosynthesis.  
647 *Electrophoresis* **22**, 2812-23.
- 648 BRUNET T. & KING, N. (2017). The Origin of Animal Multicellularity and Cell Differentiation. *Dev*  
649 *Cell* **43**, 124-140.
- 650 BUSCH S. & BRAUS, G. H. (2007). How to build a fungal fruit body: from uniform cells to  
651 specialized tissue. *Molecular Microbiology* **64**, 873-876.
- 652 CABRERA-PONCE J. L., LEON-RAMIREZ, C. G., VERVER-VARGAS, A., PALMA-TIRADO, L. & RUIZ-  
653 HERRERA, J. (2012). Metamorphosis of the Basidiomycota *Ustilago maydis*:  
654 transformation of yeast-like cells into basidiocarps. *Fungal Genet Biol* **49**, 765-71.
- 655 CAI C., LESCHEN, R. A. B., HIBBETT, D. S., XIA, F. & HUANG, D. (2017). Mycophagous rove  
656 beetles highlight diverse mushrooms in the Cretaceous. **8**, 14894.
- 657 CANFIELD D. E., POULTON, S. W. & NARBONNE, G. M. (2007). Late-Neoproterozoic Deep-Ocean  
658 Oxygenation and the Rise of Animal Life. *Science* **315**, 92-95.



- 659 CANFIELD D. E. & TESKE, A. (1996). Late Proterozoic rise in atmospheric oxygen concentration  
660 inferred from phylogenetic and sulphur-isotope studies. *Nature* **382**, 127-132.
- 661 CASSELTON L. A. (2002). Mate recognition in fungi. *Heredity (Edinb)* **88**, 142-7.
- 662 CHANG Y., WANG, S., SEKIMOTO, S., AERTS, A. L., CHOI, C., CLUM, A., LABUTTI, K. M., LINDQUIST,  
663 E. A., YEE NGAN, C., OHM, R. A., SALAMOV, A. A., GRIGORIEV, I. V., SPATAFORA, J. W. &  
664 BERBEE, M. L. (2015). Phylogenomic Analyses Indicate that Early Fungi Evolved  
665 Digesting Cell Walls of Algal Ancestors of Land Plants. *Genome Biol Evol* **7**, 1590-601.
- 666 CLAESSEN D., ROZEN, D. E., KUIPERS, O. P., SOGAARD-ANDERSEN, L. & VAN WEZEL, G. P. (2014).  
667 Bacterial solutions to multicellularity: a tale of biofilms, filaments and fruiting bodies. *Nat*  
668 *Rev Micro* **12**, 115-124.
- 669 COCK J. M., GODFROY, O., STRITTMATTER, M., SCORNET, D., UJI, T., FARNHAM, G., PETERS, F. A.  
670 & COELHO, S. M. (2015). Emergence of Ectocarpus as a model system to study the  
671 evolution of complex multicellularity in the brown algae. In *Evolutionary Transitions to*  
672 *Multicellular Life: Principles and mechanisms* (ed. I. Ruiz-Trillo and A. M. Nedelcu), pp.  
673 129-152. Springer Netherlands, Dordrecht.
- 674 COCK J. M., STERCK, L., ROUZE, P., SCORNET, D., ALLEN, A. E., AMOUTZIAS, G., ANTHOUARD, V.,  
675 ARTIGUENAVE, F., AURY, J.-M., BADGER, J. H., BESZTERI, B., BILLIAU, K., BONNET, E.,  
676 BOTHWELL, J. H., BOWLER, C., BOYEN, C., BROWNLEE, C., CARRANO, C. J., CHARRIER, B.,  
677 CHO, G. Y., COELHO, S. M., COLLEN, J., CORRE, E., DA SILVA, C., DELAGE, L.,  
678 DELAROCHE, N., DITTAMI, S. M., DOULBEAU, S., ELIAS, M., FARNHAM, G., GACHON, C. M.  
679 M., GSCHLOESSL, B., HEESCH, S., JABBARI, K., JUBIN, C., KAWAI, H., KIMURA, K.,  
680 KLOAREG, B., KUPPER, F. C., LANG, D., LE BAIL, A., LEBLANC, C., LEROUGE, P., LOHR, M.,  
681 LOPEZ, P. J., MARTENS, C., MAUMUS, F., MICHEL, G., MIRANDA-SAAVEDRA, D., MORALES,  
682 J., MOREAU, H., MOTOMURA, T., NAGASATO, C., NAPOLI, C. A., NELSON, D. R., NYVALL-  
683 COLLEN, P., PETERS, A. F., POMMIER, C., POTIN, P., POULAIN, J., QUESNEVILLE, H., READ,  
684 B., RENSING, S. A., RITTER, A., ROUSVOAL, S., SAMANTA, M., SAMSON, G., SCHROEDER, D.  
685 C., SEGURENS, B., STRITTMATTER, M., TONON, T., TREGEAR, J. W., VALENTIN, K., VON  
686 DASSOW, P., YAMAGISHI, T., VAN DE PEER, Y. & WINCKER, P. (2010). The Ectocarpus  
687 genome and the independent evolution of multicellularity in brown algae. *Nature* **465**,  
688 617-621.
- 689 COSTACHEL C., CODDEVILLE, B., LATGE, J. P. & FONTAINE, T. (2005).  
690 Glycosylphosphatidylinositol-anchored fungal polysaccharide in *Aspergillus fumigatus*. *J*  
691 *Biol Chem* **280**, 39835-42.

- 692 COTTIER F. & MÜHLSCHLEGEL, F. A. (2012). Communication in Fungi. *International Journal of*  
693 *Microbiology* **2012**, 9.
- 694 D'SOUZA C. A. & HEITMAN, J. (2001). Conserved cAMP signaling cascades regulate fungal  
695 development and virulence. *FEMS Microbiology Reviews* **25**, 349-364.
- 696 DE GROOT P. W. J., BADER, O., DE BOER, A. D., WEIG, M. & CHAUHAN, N. (2013). Adhesins in  
697 Human Fungal Pathogens: Glue with Plenty of Stick. *Eukaryot Cell* **12**, 470-481.
- 698 DE MENDOZA A., SEBÉ-PEDRÓS, A. & RUIZ-TRILLO, I. (2014). The Evolution of the GPCR  
699 Signaling System in Eukaryotes: Modularity, Conservation, and the Transition to  
700 Metazoan Multicellularity. *Genome Biology and Evolution* **6**, 606-619.
- 701 DEE J. M., MOLLICONE, M., LONGCORE, J. E., ROBERSON, R. W. & BERBEE, M. L. (2015). Cytology  
702 and molecular phylogenetics of Monoblepharidomycetes provide evidence for multiple  
703 independent origins of the hyphal habit in the Fungi. *Mycologia* **107**, 710-28.
- 704 DOS REIS M., THAWORNWATTANA, Y., ANGELIS, K., TELFORD, MAXIMILIAN J., DONOGHUE, PHILIP C.  
705 & YANG, Z. (2015). Uncertainty in the Timing of Origin of Animals and the Limits of  
706 Precision in Molecular Timescales. *Current Biology* **25**, 2939-2950.
- 707 DRANGINIS A. M., RAUCEO, J. M., CORONADO, J. E. & LIPKE, P. N. (2007). A Biochemical Guide to  
708 Yeast Adhesins: Glycoproteins for Social and Antisocial Occasions. *Microbiology and*  
709 *Molecular Biology Reviews* **71**, 282-294.
- 710 DRESSAIRE E., YAMADA, L., SONG, B. & ROPER, M. (2016). Mushrooms use convectively created  
711 airflows to disperse their spores. *Proc Natl Acad Sci U S A* **113**, 2833-8.
- 712 DU Q., KAWABE, Y., SCHILDE, C., CHEN, Z.-H. & SCHAAP, P. (2015). The Evolution of Aggregative  
713 Multicellularity and Cell–Cell Communication in the Dictyostelia. *Journal of Molecular*  
714 *Biology* **427**, 3722-3733.
- 715 DUBRAVCIC D., VAN BAALEN, M. & NIZAK, C. (2014). An evolutionarily significant unicellular  
716 strategy in response to starvation in Dictyostelium social amoebae. *F1000Research* **3**,  
717 133.
- 718 EPSTEIN L. & NICHOLSON, R. (2016). Adhesion and Adhesives of Fungi and Oomycetes. In  
719 *Biological Adhesives* (ed. A. M. Smith), pp. 25-55. Springer International Publishing,  
720 Cham.
- 721 FAIRCLOUGH S. R., DAYEL, M. J. & KING, N. (2010). Multicellular Development in a  
722 Choanoflagellate. *Current biology : CB* **20**, R875-R876.
- 723 FLOUDAS D., BINDER, M., RILEY, R., BARRY, K., BLANCHETTE, R. A., HENRISSAT, B., MARTINEZ, A.  
724 T., OTILLAR, R., SPATAFORA, J. W., YADAV, J. S., AERTS, A., BENOIT, I., BOYD, A.,  
725 CARLSON, A., COPELAND, A., COUTINHO, P. M., DE VRIES, R. P., FERREIRA, P., FINDLEY,

726 K., FOSTER, B., GASKELL, J., GLOTZER, D., GORECKI, P., HEITMAN, J., HESSE, C., HORI, C.,  
727 IGARASHI, K., JURGENS, J. A., KALLEN, N., KERSTEN, P., KOHLER, A., KUES, U., KUMAR, T.  
728 K., KUO, A., LABUTTI, K., LARRONDO, L. F., LINDQUIST, E., LING, A., LOMBARD, V., LUCAS,  
729 S., LUNDELL, T., MARTIN, R., MCLAUGHLIN, D. J., MORGENSTERN, I., MORIN, E., MURAT, C.,  
730 NAGY, L. G., NOLAN, M., OHM, R. A., PATYSHAKULIYEVA, A., ROKAS, A., RUIZ-DUENAS, F.  
731 J., SABAT, G., SALAMOV, A., SAMEJIMA, M., SCHMUTZ, J., SLOT, J. C., ST JOHN, F.,  
732 STENLID, J., SUN, H., SUN, S., SYED, K., TSANG, A., WIEBENGA, A., YOUNG, D.,  
733 PISABARRO, A., EASTWOOD, D. C., MARTIN, F., CULLEN, D., GRIGORIEV, I. V. & HIBBETT, D.  
734 S. (2012). The Paleozoic origin of enzymatic lignin decomposition reconstructed from 31  
735 fungal genomes. *Science* **336**, 1715-9.

736 FREY S., RESCHKA, E. J. & POGGELER, S. (2015). Germinal Center Kinases SmKIN3 and  
737 SmKIN24 Are Associated with the Sordaria macrospora Striatin-Interacting Phosphatase  
738 and Kinase (STRIPAK) Complex. *PLoS One* **10**, e0139163.

739 FRICKER M. D., HEATON, L. L. M., JONES, N. S. & BODDY, L. (2017). The Mycelium as a Network.  
740 *Microbiology Spectrum* **5**.

741 GOMPEL N. & PRUD'HOMME, B. (2009). The causes of repeated genetic evolution.  
742 *Developmental Biology* **332**, 36-47.

743 GRAU-BOVE X., TORRUELLA, G., DONACHIE, S., SUGA, H., LEONARD, G., RICHARDS, T. A. & RUIZ-  
744 TRILLO, I. (2017). Dynamics of genomic innovation in the unicellular ancestry of animals.  
745 *Elife* **6**.

746 GROSBERG R. K. & STRATHMANN, R. R. (2007). The Evolution of Multicellularity: A Minor Major  
747 Transition? *Annual Review of Ecology, Evolution, and Systematics* **38**, 621-654.

748 GYAWALI R., UPADHYAY, S., WAY, J. & LIN, X. (2017). A Family of Secretory Proteins Is  
749 Associated with Different Morphotypes in *Cryptococcus neoformans*. *Appl Environ*  
750 *Microbiol* **83**.

751 HANSCHEN E. R., MARRIAGE, T. N., FERRIS, P. J., HAMAJI, T., TOYODA, A., FUJIYAMA, A., NEME,  
752 R., NOGUCHI, H., MINAKUCHI, Y., SUZUKI, M., KAWAI-TOYOOKA, H., SMITH, D. R., SPARKS,  
753 H., ANDERSON, J., BAKARIĆ, R., LURIA, V., KARGER, A., KIRSCHNER, M. W., DURAND, P.  
754 M., MICHOD, R. E., NOZAKI, H. & OLSON, B. J. S. C. (2016). The *Gonium pectorale*  
755 genome demonstrates co-option of cell cycle regulation during the evolution of  
756 multicellularity. **7**, 11370.

757 HARRIS S. D. (2011). Hyphal morphogenesis: an evolutionary perspective. *Fungal Biology* **115**,  
758 475-484.

- 759 HASSAN M. A., ROUF, R., TIRALONGO, E., MAY, T. W. & TIRALONGO, J. (2015). Mushroom lectins:  
760 specificity, structure and bioactivity relevant to human disease. *Int J Mol Sci* **16**, 7802-  
761 38.
- 762 HECKMAN D. S., GEISER, D. M., EIDELL, B. R., STAUFFER, R. L., KARDOS, N. L. & HEDGES, S. B.  
763 (2001). Molecular evidence for the early colonization of land by fungi and plants. *Science*  
764 **293**, 1129-33.
- 765 HERRERO A., STAVANS, J. & FLORES, E. (2016). The multicellular nature of filamentous  
766 heterocyst-forming cyanobacteria. *FEMS Microbiology Reviews* **40**, 831-854.
- 767 HERRON M. D. & NEDELCO, A. M. (2015). Volvocine Algae: From Simple to Complex  
768 Multicellularity. In *Evolutionary Transitions to Multicellular Life: Principles and*  
769 *mechanisms* (ed. I. Ruiz-Trillo and A. M. Nedelcu), pp. 129-152. Springer Netherlands,  
770 Dordrecht.
- 771 HIBBETT D., GRIMALDI, D. & DONOGHUE, M. (1997). Fossil mushrooms from Miocene and  
772 Cretaceous ambers and the evolution of Homobasidiomycetes. *Am J Bot* **84**, 981.
- 773 HIBBETT D. S. (2007). After the gold rush, or before the flood? Evolutionary morphology of  
774 mushroom-forming fungi (Agaricomycetes) in the early 21st century. *Mycol Res* **111**,  
775 1001-18.
- 776 HIBBETT D. S. & BINDER, M. (2002). Evolution of complex fruiting-body morphologies in  
777 homobasidiomycetes. *Proc Biol Sci* **269**, 1963-9.
- 778 HIBBETT D. S., BINDER, M., WANG, Z. & GOLDMAN, Y. (2003). Another fossil agaric from  
779 Dominican amber. *Mycologia* **95**, 685-7.
- 780 HIBBETT D. S., GRIMALDI, D. & DONOGHUE, M. J. (1995). Cretaceous mushrooms in amber.  
781 *Nature* **377**, 487-487.
- 782 IDNURM A. & HEITMAN, J. (2005). Light Controls Growth and Development via a Conserved  
783 Pathway in the Fungal Kingdom. *PLoS Biology* **3**, e95.
- 784 IDNURM A. & HEITMAN, J. (2010). Ferrochelatase is a conserved downstream target of the blue  
785 light-sensing White collar complex in fungi. *Microbiology* **156**, 2393-2407.
- 786 JOHNSTON D. T., POULTON, S. W., DEHLER, C., PORTER, S., HUSSON, J., CANFIELD, D. E. &  
787 KNOLL, A. H. (2010). An emerging picture of Neoproterozoic ocean chemistry: Insights  
788 from the Chuar Group, Grand Canyon, USA. *Earth and Planetary Science Letters* **290**,  
789 64-73.
- 790 JONES S. K. & BENNETT, R. J. (2011). Fungal Mating Pheromones: Choreographing the Dating  
791 Game. *Fungal genetics and biology : FG & B* **48**, 668-676.
- 792 KAISER D. (2001). Building a Multicellular Organism. *Annual Review of Genetics* **35**, 103-123.

- 793 KAMADA T. (2002). Molecular genetics of sexual development in the mushroom *Coprinus*  
794 *cinereus*. *Bioessays* **24**, 449-59.
- 795 KAMADA T., SANO, H., NAKAZAWA, T. & NAKAHORI, K. (2010). Regulation of fruiting body  
796 photomorphogenesis in *Coprinopsis cinerea*. *Fungal Genet Biol* **47**, 917-21.
- 797 KICKA S. & SILAR, P. (2004). PaASK1, a Mitogen-Activated Protein Kinase Kinase Kinase That  
798 Controls Cell Degeneration and Cell Differentiation in *Podospora anserina*.  
799 *Genetics* **166**, 1241-1252.
- 800 KIM H., KIM, H.-K., LEE, S. & YUN, S.-H. (2015). The White Collar Complex Is Involved in Sexual  
801 Development of *Fusarium graminearum*. *PLOS ONE* **10**, e0120293.
- 802 KIM H., WRIGHT, S. J., PARK, G., OUYANG, S., KRSTOFOVA, S. & BORKOVICH, K. A. (2012). Roles  
803 for receptors, pheromones, G proteins, and mating type genes during sexual  
804 reproduction in *Neurospora crassa*. *Genetics* **190**, 1389-404.
- 805 KING N. (2004). The unicellular ancestry of animal development. *Dev Cell* **7**, 313-25.
- 806 KING N., HITTINGER, C. T. & CARROLL, S. B. (2003). Evolution of Key Cell Signaling and  
807 Adhesion Protein Families Predates Animal Origins. *Science* **301**, 361-363.
- 808 KNOLL A. (2011). The Multiple Origins of Complex Multicellularity. *Earth and Planetary Sciences*  
809 **39**, 217-239.
- 810 KNOLL A. & HEWITT, D. (2011). Phylogenetic, functional and ecological perspectives in complex  
811 multicellularity. In *Major transitions in evolution revisited*. MIT Press, Cambridge.
- 812 KNOLL A. & LAHR, D. (2016). Fossils, Feeding and the Evolution of Complex Multicellularity. In  
813 *Multicellularity: origins and evolution*, vol. The Vienna Series in Theoretical Biology (ed.  
814 K. Niklas, S. Newman and J. Bonner). MIT Press.
- 815 KOHLER A., KUO, A., NAGY, L. G., MORIN, E., ..., GRIGORIEV, I. V., HIBBETT, D. S. & MARTIN, F.  
816 (2015). Convergent losses of decay mechanisms and rapid turnover of symbiosis genes  
817 in mycorrhizal mutualists. *Nature Genetics* **in press**.
- 818 KRUZEL E. K., GILES, S. S. & HULL, C. M. (2012). Analysis of *Cryptococcus neoformans* Sexual  
819 Development Reveals Rewiring of the Pheromone-Response Network by a Change in  
820 Transcription Factor Identity. *Genetics* **191**, 435-449.
- 821 KUCK U., BEIER, A. M. & TEICHERT, I. (2016). The composition and function of the striatin-  
822 interacting phosphatases and kinases (STRIPAK) complex in fungi. *Fungal Genet Biol*  
823 **90**, 31-38.
- 824 KUES U. (2000). Life history and developmental processes in the basidiomycete *Coprinus*  
825 *cinereus*. *Microbiol Mol Biol Rev* **64**, 316-53.

- 826 KUES U., GRANADO, J. D., HERMANN, R., BOULIANNE, R. P., KERTESZ-CHALOUPKOVA, K. & AEBI,  
827 M. (1998). The A mating type and blue light regulate all known differentiation processes  
828 in the basidiomycete *Coprinus cinereus*. *Mol Gen Genet* **260**, 81-91.
- 829 KUES U., WALSER, P. J., KLAUS, M. J. & AEBI, M. (2002). Influence of activated A and B mating-  
830 type pathways on developmental processes in the basidiomycete *Coprinus cinereus*.  
831 *Mol Genet Genomics* **268**, 262-71.
- 832 KUNZLER M. (2015). Hitting the sweet spot-glycans as targets of fungal defense effector  
833 proteins. *Molecules* **20**, 8144-67.
- 834 LAKKIREDDY K., NAVARRO-GONZÁLEZ, M., VELAGAPUDI, R. & KÜES, U. (2011). *Proteins*  
835 *expressed during hyphal aggregation for fruiting body formation in basidiomycetes*.
- 836 LENGELER K. B., DAVIDSON, R. C., D'SOUZA, C., HARASHIMA, T., SHEN, W.-C., WANG, P., PAN, X.,  
837 WAUGH, M. & HEITMAN, J. (2000). Signal Transduction Cascades Regulating Fungal  
838 Development and Virulence. *Microbiology and Molecular Biology Reviews* **64**, 746-785.
- 839 LEW R. R. (2011). How does a hypha grow? The biophysics of pressurized growth in fungi. *Nat*  
840 *Rev Microbiol* **9**, 509-18.
- 841 LICHIOUS A., LORD, K. M., JEFFREE, C. E., OBORNY, R., BOONYARUNGSRIT, P. & READ, N. D.  
842 (2012). Importance of MAP Kinases during Protoperithecial Morphogenesis in  
843 *Neurospora crassa*. *PLOS ONE* **7**, e42565.
- 844 LIPKE P. N. & KURJAN, J. (1992). Sexual agglutination in budding yeasts: structure, function, and  
845 regulation of adhesion glycoproteins. *Microbiological Reviews* **56**, 180-194.
- 846 LIU T.-B., CHEN, G.-Q., MIN, H. & LIN, F.-C. (2009). MoFLP1, encoding a novel fungal fasciclin-  
847 like protein, is involved in conidiation and pathogenicity in *Magnaporthe oryzae*. *Journal*  
848 *of Zhejiang University SCIENCE B* **10**, 434-444.
- 849 LÓPEZ-BERGES M. S., RISPAIL, N., PRADOS-ROSALES, R. C. & DI PIETRO, A. (2010). A Nitrogen  
850 Response Pathway Regulates Virulence Functions in *Fusarium oxysporum* via the  
851 Protein Kinase TOR and the bZIP Protein MeaB. *The Plant Cell* **22**, 2459-2475.
- 852 LORD K. M. & READ, N. D. (2011). Perithecial morphogenesis in *Sordaria macrospora*. *Fungal*  
853 *Genet Biol* **48**, 388-99.
- 854 LU B. C. K. (2006). Programmed Cell Death in Fungi. In *Growth, Differentiation and Sexuality*  
855 (ed. U. Kües and R. Fischer), pp. 167-187. Springer Berlin Heidelberg, Berlin,  
856 Heidelberg.
- 857 LUGONES L. G., WÖSTEN, H. A. B., BIRKENKAMP, K. U., SJOLLEMA, K. A., ZAGERS, J. & WESSELS,  
858 J. G. H. (1999). Hydrophobins line air channels in fruiting bodies of *Schizophyllum*  
859 *commune* and *Agaricus bisporus*. *Mycological Research* **103**, 635-640.



- 860 MILLER W. T. (2012). Tyrosine kinase signaling and the emergence of multicellularity.  
861 *Biochimica et Biophysica Acta (BBA) - Molecular Cell Research* **1823**, 1053-1057.
- 862 MIYAZAKI Y., KANEKO, S., SUNAGAWA, M., SHISHIDO, K., YAMAZAKI, T., NAKAMURA, M. &  
863 BABASAKI, K. (2007). The fruiting-specific Le.flp1 gene, encoding a novel fungal fasciclin-  
864 like protein, of the basidiomycetous mushroom *Lentinula edodes*. *Current Genetics* **51**,  
865 367-375.
- 866 MOORE D. (2005). *Principles of Mushroom Developmental Biology*.
- 867 MUELLER U. G. (2002). Ant versus fungus versus mutualism: ant-cultivar conflict and the  
868 deconstruction of the attine ant-fungus symbiosis. *Am Nat* **160 Suppl 4**, S67-98.
- 869 NAGY L. G. Evolution: Complex Multicellular Life with 5,500 Genes. *Current Biology* **27**, R609-  
870 R612.
- 871 NAGY L. G., OHM, R. A., KOVÁCS, G. M., FLOUDAS, D., RILEY, R., GÁCSEK, A., SIPICZKI, M., DAVIS,  
872 J. M., DOTY, S. L., DE HOOG, G. S., LANG, B. F., SPATAFORA, J. W., MARTIN, F. M.,  
873 GRIGORIEV, I. V. & HIBBETT, D. S. (2014). Latent homology and convergent regulatory  
874 evolution underlies the repeated emergence of yeasts. **5**, 4471.
- 875 NEWBY L. J., CATEN, C. E. & GREEN, J. R. (2007). Rapid adhesion of *Stagonospora nodorum*  
876 spores to a hydrophobic surface requires pre-formed cell surface glycoproteins. *Mycol*  
877 *Res* **111**, 1255-67.
- 878 NGUYEN T. A., CISSE, O. H., YUN WONG, J., ZHENG, P., HEWITT, D., NOWROUSIAN, M., STAJICH, J.  
879 E. & JEDD, G. (2017). Innovation and constraint leading to complex multicellularity in the  
880 Ascomycota. *Nat Commun* **8**, 14444.
- 881 NIKLAS K. J. (2014). The evolutionary-developmental origins of multicellularity. *Am J Bot* **101**, 6-  
882 25.
- 883 NIKLAS K. J., COBB, E. D. & CRAWFORD, D. R. (2013a). The evo-devo of multinucleate cells,  
884 tissues, and organisms, and an alternative route to multicellularity. *Evol Dev* **15**, 466-74.
- 885 NIKLAS K. J. & NEWMAN, S. (2016). *Multicellularity : origins and evolution*.
- 886 NIKLAS K. J. & NEWMAN, S. A. (2013b). The origins of multicellular organisms. *Evol Dev* **15**, 41-  
887 52.
- 888 NOWROUSIAN M. (2014). Genomics and transcriptomics to analyze fruiting body development. In  
889 *The Mycota XIII. Fungal Genomics* (ed. M. Nowrousian), pp. 149–172. Springer, Berlin.
- 890 PANGANIBAN G., IRVINE, S. M., LOWE, C., ROEHL, H., CORLEY, L. S., SHERBON, B., GRENIER, J. K.,  
891 FALLON, J. F., KIMBLE, J., WALKER, M., WRAY, G. A., SWALLA, B. J., MARTINDALE, M. Q. &  
892 CARROLL, S. B. (1997). The origin and evolution of animal appendages. *Proceedings of*  
893 *the National Academy of Sciences* **94**, 5162-5166.

- 894 PARFREY L. W., LAHR, D. J., KNOLL, A. H. & KATZ, L. A. (2011). Estimating the timing of early  
895 eukaryotic diversification with multigene molecular clocks. *Proc Natl Acad Sci U S A* **108**,  
896 13624-9.
- 897 PLAZA D. F., LIN, C. W., VAN DER VELDEN, N. S., AEBI, M. & KUNZLER, M. (2014). Comparative  
898 transcriptomics of the model mushroom *Coprinopsis cinerea* reveals tissue-specific  
899 armories and a conserved circuitry for sexual development. *BMC Genomics* **15**, 492.
- 900 PÖGGELER S., NOWROUSIAN, M. & KÜCK, U. (2006). Fruiting-Body Development in Ascomycetes.  
901 In *Growth, Differentiation and Sexuality* (ed. U. Kües and R. Fischer), pp. 325-355.  
902 Springer Berlin Heidelberg, Berlin, Heidelberg.
- 903 POINAR G. O., JR. & SINGER, R. (1990). Upper eocene gilled mushroom from the dominican  
904 republic. *Science* **248**, 1099-101.
- 905 PRIETO M. & WEDIN, M. (2013). Dating the Diversification of the Major Lineages of Ascomycota  
906 (Fungi). *PLOS ONE* **8**, e65576.
- 907 PRUD'HOMME B., GOMPEL, N. & CARROLL, S. B. (2007). Emerging principles of regulatory  
908 evolution. *Proc Natl Acad Sci U S A* **104 Suppl 1**, 8605-12.
- 909 PURSCHWITZ J., MÜLLER, S., KASTNER, C., SCHÖSER, M., HAAS, H., ESPESO, E. A., ATOUI, A.,  
910 CALVO, A. M. & FISCHER, R. (2008). Functional and Physical Interaction of Blue- and  
911 Red-Light Sensors in *Aspergillus nidulans*. *Current Biology* **18**, 255-259.
- 912 RAINEY P. B. & DE MONTE, S. (2014). Resolving Conflicts During the Evolutionary Transition to  
913 Multicellular Life. *Ann Rev Ecol Evol Syst* **45**, 599-620.
- 914 RATCLIFF W. C., DENISON, R. F., BORRELLO, M. & TRAVISANO, M. (2012). Experimental evolution  
915 of multicellularity. *Proc Natl Acad Sci U S A* **109**, 1595-600.
- 916 RATCLIFF W. C., HERRON, M. D., HOWELL, K., PENTZ, J. T., ROSENZWEIG, F. & TRAVISANO, M.  
917 (2013). Experimental evolution of an alternating uni- and multicellular life cycle in  
918 *Chlamydomonas reinhardtii*. *Nat Commun* **4**, 2742.
- 919 RAUDASKOSKI M. & KOTHE, E. (2010). Basidiomycete mating type genes and pheromone  
920 signaling. *Eukaryot Cell* **9**, 847-59.
- 921 RICHTER D. J. & KING, N. (2013). The Genomic and Cellular Foundations of Animal Origins.  
922 *Annual Review of Genetics* **47**, 509-537.
- 923 ROBLEDO-BRIONES M. & RUIZ-HERRERA, J. (2013). Regulation of genes involved in cell wall  
924 synthesis and structure during *Ustilago maydis* dimorphism. *FEMS Yeast Research* **13**,  
925 74-84.
- 926 RODRIGUEZ-ROMERO J., HEDTKE, M., KASTNER, C., MULLER, S. & FISCHER, R. (2010). Fungi,  
927 hidden in soil or up in the air: light makes a difference. *Annu Rev Microbiol* **64**, 585-610.

- 928 ROKAS A. (2008). The Origins of Multicellularity and the Early History of the Genetic Toolkit For  
929 Animal Development. *Annual Review of Genetics* **42**, 235-251.
- 930 ROPER M., SEMINARA, A., BANDI, M. M., COBB, A., DILLARD, H. R. & PRINGLE, A. (2010). Dispersal  
931 of fungal spores on a cooperatively generated wind. *Proc Natl Acad Sci U S A* **107**,  
932 17474-9.
- 933 SAKAMOTO Y., NAKADE, K., KONNO, N. & SATO, T. (2017). Senescence of the *Lentinula edodes*  
934 Fruiting Body After Harvesting.
- 935 SCHOCH C. L., SUNG, G.-H., LÓPEZ-GIRÁLDEZ, F., TOWNSEND, J. P., MIADLIKOWSKA, J.,  
936 HOFSTETTER, V., ROBERTSE, B., MATHENY, P. B., KAUFF, F., WANG, Z., GUEIDAN, C.,  
937 ANDRIE, R. M., TRIPPE, K., CIUFETTI, L. M., WYNN, A., FRAKER, E., HODKINSON, B. P.,  
938 BONITO, G., GROENEWALD, J. Z., ARZANLOU, M., SYBREN DE HOOG, G., CROUS, P. W.,  
939 HEWITT, D., PFISTER, D. H., PETERSON, K., GRYZENHOUT, M., WINGFIELD, M. J., APTROOT,  
940 A., SUH, S.-O., BLACKWELL, M., HILLIS, D. M., GRIFFITH, G. W., CASTLEBURY, L. A.,  
941 ROSSMAN, A. Y., LUMBSCH, H. T., LÜCKING, R., BÜDEL, B., RAUHUT, A., DIEDERICH, P.,  
942 ERTZ, D., GEISER, D. M., HOSAKA, K., INDERBITZIN, P., KOHLMAYER, J., VOLKMANN-  
943 KOHLMAYER, B., MOSTERT, L., O'DONNELL, K., SIPMAN, H., ROGERS, J. D., SHOEMAKER, R.  
944 A., SUGIYAMA, J., SUMMERBELL, R. C., UNTEREINER, W., JOHNSTON, P. R., STENROOS, S.,  
945 ZUCCARO, A., DYER, P. S., CRITTENDEN, P. D., COLE, M. S., HANSEN, K., TRAPPE, J. M.,  
946 YAHR, R., LUTZONI, F. & SPATAFORA, J. W. (2009). The Ascomycota Tree of Life: A  
947 Phylum-wide Phylogeny Clarifies the Origin and Evolution of Fundamental Reproductive  
948 and Ecological Traits. *Systematic Biology* **58**, 224-239.
- 949 SEBE-PEDROS A., DEGNAN, B. M. & RUIZ-TRILLO, I. (2017). The origin of Metazoa: a unicellular  
950 perspective. *Nat Rev Genet* **18**, 498-512.
- 951 SEBÉ-PEDRÓS A., IRIMIA, M., DEL CAMPO, J., PARRA-ACERO, H., RUSS, C., NUSBAUM, C.,  
952 BLENCOWE, B. J. & RUIZ-TRILLO, I. (2013). Regulated aggregative multicellularity in a  
953 close unicellular relative of metazoa. *Elife* **2**, e01287.
- 954 SHARPE S. C., EME, L., BROWN, M. W. & ROGER, A. J. (2015). Timing the origins of multicellular  
955 eukaryotes through phylogenomics and relaxed molecular clock analyses. In  
956 *Evolutionary Transitions to Multicellular Life*, vol. Advances in Marine Genomics 2 (ed. I.  
957 Ruiz-Trillo). Springer.
- 958 SHERTZ C. A., BASTIDAS, R. J., LI, W., HEITMAN, J. & CARDENAS, M. E. (2010). Conservation,  
959 duplication, and loss of the Tor signaling pathway in the fungal kingdom. *BMC Genomics*  
960 **11**, 510-510.

- 961 SHUBIN N., TABIN, C. & CARROLL, S. (2009). Deep homology and the origins of evolutionary  
962 novelty. *Nature* **457**, 818-823.
- 963 SILBERFELD T., LEIGH, J. W., VERBRUGGEN, H., CRUAUD, C., DE REVIERS, B. & ROUSSEAU, F.  
964 (2010). A multi-locus time-calibrated phylogeny of the brown algae (Heterokonta,  
965 Ochrophyta, Phaeophyceae): Investigating the evolutionary nature of the “brown algal  
966 crown radiation”. *Molecular Phylogenetics and Evolution* **56**, 659-674.
- 967 SMITH M. E., GRYGANSKYI, A., BONITO, G., NOUHRA, E., MORENO-ARROYO, B. & BENNY, G.  
968 (2013). Phylogenetic analysis of the genus *Modicella* reveals an independent  
969 evolutionary origin of sporocarp-forming fungi in the Mortierellales. *Fungal Genet Biol* **61**,  
970 61-8.
- 971 STAJICH J. E., BERBEE, M. L., BLACKWELL, M., HIBBETT, D. S., JAMES, T. Y., SPATAFORA, J. W. &  
972 TAYLOR, J. W. (2009). The Fungi. *Current Biology* **19**, R840-R845.
- 973 STAJICH J. E., WILKE, S. K., AHREN, D., AU, C. H., BIRREN, B. W., BORODOVSKY, M., BURNS, C.,  
974 CANBACK, B., CASSELTON, L. A., CHENG, C. K., DENG, J., DIETRICH, F. S., FARGO, D. C.,  
975 FARMAN, M. L., GATHMAN, A. C., GOLDBERG, J., GUIGO, R., HOEGGER, P. J., HOOKER, J.  
976 B., HUGGINS, A., JAMES, T. Y., KAMADA, T., KILARU, S., KODIRA, C., KUES, U., KUPFER, D.,  
977 KWAN, H. S., LOMSADZE, A., LI, W., LILLY, W. W., MA, L. J., MACKAY, A. J., MANNING, G.,  
978 MARTIN, F., MURAGUCHI, H., NATVIG, D. O., PALMERINI, H., RAMESH, M. A., REHMEYER, C.  
979 J., ROE, B. A., SHENOY, N., STANKE, M., TER-HOVHANNISYAN, V., TUNLID, A., VELAGAPUDI,  
980 R., VISION, T. J., ZENG, Q., ZOLAN, M. E. & PUKKILA, P. J. (2010). Insights into evolution of  
981 multicellular fungi from the assembled chromosomes of the mushroom *Coprinopsis*  
982 *cinerea* (*Coprinus cinereus*). *Proc Natl Acad Sci U S A* **107**, 11889-94.
- 983 STERN D. L. (2013). The genetic causes of convergent evolution. *Nat Rev Genet* **14**, 751-764.
- 984 SUGIYAMA J., HOSAKA, K. & SUH, S. O. (2006). Early diverging Ascomycota: phylogenetic  
985 divergence and related evolutionary enigmas. *Mycologia* **98**, 996-1005.
- 986 SUNDSTROM P. (1999). Adhesins in *Candida albicans*. *Curr Opin Microbiol* **2**, 353-7.
- 987 SUNDSTROM P. (2002). Adhesion in *Candida* spp. *Cell Microbiol* **4**, 461-9.
- 988 SZATHMARY E. & SMITH, J. M. (1995). The major evolutionary transitions. *Nature* **374**, 227-32.
- 989 SZETO C. Y., LEUNG, G. S. & KWAN, H. S. (2007). Le.MAPK and its interacting partner,  
990 Le.DRMIP, in fruiting body development in *Lentinula edodes*. *Gene* **393**, 87-93.
- 991 TAYLOR J. W. & ELLISON, C. E. (2010). Mushrooms: Morphological complexity in the fungi.  
992 *Proceedings of the National Academy of Sciences* **107**, 11655-11656.

- 993 TAYLOR T. N., HASS, H., KERP, H., KRINGS, M. & HANLIN, R. T. (2005). Perithecial ascomycetes  
994 from the 400 million year old Rhynie chert: an example of ancestral polymorphism.  
995 *Mycologia* **97**, 269-85.
- 996 TEICHERT I., DAHLMANN, T. A., KUCK, U. & NOWROUSIAN, M. (2017). RNA Editing During Sexual  
997 Development Occurs in Distantly Related Filamentous Ascomycetes. *Genome Biol Evol*  
998 **9**, 855-868.
- 999 TELFORD MAXIMILIAN J., BUDD, GRAHAM E. & PHILIPPE, H. Phylogenomic Insights into Animal  
1000 Evolution. *Current Biology* **25**, R876-R887.
- 1001 TRAIL F. (2007). Fungal cannons: explosive spore discharge in the Ascomycota. *FEMS*  
1002 *Microbiology Letters* **276**, 12-18.
- 1003 TRAIL F. (2013). Sex and fruiting in Fusarium. *Fusarium: Genomics, Molecular and Cellular*  
1004 *Biology (Edited by: Daren W. Brown and Robert H. Proctor)*. Caister Academic Press,  
1005 U.K. (2013).
- 1006 TRAIL F. & D.M., G. (2014). Application of Genomics to the Study of Pathogenicity and  
1007 Development in Fusarium. *The Mycota XIII, Fungal Genomics, Chapter 11*.
- 1008 TUCKER S. L. & TALBOT, N. J. (2001). SURFACE ATTACHMENT AND PRE-PENETRATION  
1009 STAGE DEVELOPMENT BY PLANT PATHOGENIC FUNGI. *Annual Review of*  
1010 *Phytopathology* **39**, 385-417.
- 1011 UMAR H. M. & VAN GRIENSVEN, L. (1998). The role of morphogenetic cell death in the  
1012 histogenesis of the mycelial cord of *Agaricus bisporus* and in the development of  
1013 macrofungi. *Mycological Research* **102**, 719-735.
- 1014 UMEN J. G. (2014). Green Algae and the Origins of Multicellularity in the Plant Kingdom. *Cold*  
1015 *Spring Harbor Perspectives in Biology* **6**, a016170.
- 1016 VERMA S. & IDNURM, A. (2013). The Uve1 Endonuclease Is Regulated by the White Collar  
1017 Complex to Protect *Cryptococcus neoformans* from UV Damage. *PLOS Genetics* **9**,  
1018 e1003769.
- 1019 VOIGT O., HERZOG, B., JAKOBSHAGEN, A. & PÖGGELER, S. (2013). bZIP transcription factor  
1020 SmJLB1 regulates autophagy-related genes *Smatg8* and *Smatg4* and is required for  
1021 fruiting-body development and vegetative growth in *Sordaria macrospora*. *Fungal*  
1022 *Genetics and Biology* **61**, 50-60.
- 1023 VOIGT O. & PÖGGELER, S. (2013). Autophagy genes *Smatg8* and *Smatg4* are required for  
1024 fruiting-body development, vegetative growth and ascospore germination in the  
1025 filamentous ascomycete *Sordaria macrospora*. *Autophagy* **9**, 33-49.

- 1026 WAKE D. B., WAKE, M. H. & SPECHT, C. D. (2011). Homoplasy: From Detecting Pattern to  
1027 Determining Process and Mechanism of Evolution. *Science* **331**, 1032-1035.
- 1028 WANG L., TIAN, X., GYAWALI, R. & LIN, X. (2013). Fungal adhesion protein guides community  
1029 behaviors and autoinduction in a paracrine manner. *Proc Natl Acad Sci U S A* **110**,  
1030 11571-6.
- 1031 WANG Q. M., GROENEWALD, M., TAKASHIMA, M., THEELEN, B., HAN, P. J., LIU, X. Z., BOEKHOUT, T.  
1032 & BAI, F. Y. (2015). Phylogeny of yeasts and related filamentous fungi within  
1033 Pucciniomycotina determined from multigene sequence analyses. *Studies in Mycology*  
1034 **81**, 27-53.
- 1035 WEIG M., JANSCH, L., GROSS, U., DE KOSTER, C. G., KLIS, F. M. & DE GROOT, P. W. (2004).  
1036 Systematic identification in silico of covalently bound cell wall proteins and analysis of  
1037 protein-polysaccharide linkages of the human pathogen *Candida glabrata*. *Microbiology*  
1038 **150**, 3129-44.
- 1039 WONGSUK T., PUMESAT, P. & LUPLERTLOP, N. (2016). Fungal quorum sensing molecules: Role  
1040 in fungal morphogenesis and pathogenicity. *J Basic Microbiol* **56**, 440-7.
- 1041 WOOLSTON B. M., SCHLAGNHAUFER, C., WILKINSON, J., LARSEN, J., SHI, Z., MAYER, K. M.,  
1042 WALTERS, D. S., CURTIS, W. R. & ROMAINE, C. P. (2011). Long-Distance Translocation of  
1043 Protein during Morphogenesis of the Fruiting Body in the Filamentous Fungus, *Agaricus*  
1044 *bisporus*. *PLOS ONE* **6**, e28412.
- 1045 XIAO S., KNOLL, A. H., YUAN, X. & PUESCHEL, C. M. (2004). Phosphatized multicellular algae in  
1046 the Neoproterozoic Doushantuo Formation, China, and the early evolution of  
1047 florideophyte red algae. *Am J Bot* **91**, 214-27.

1048

1049 **Figures**

1050



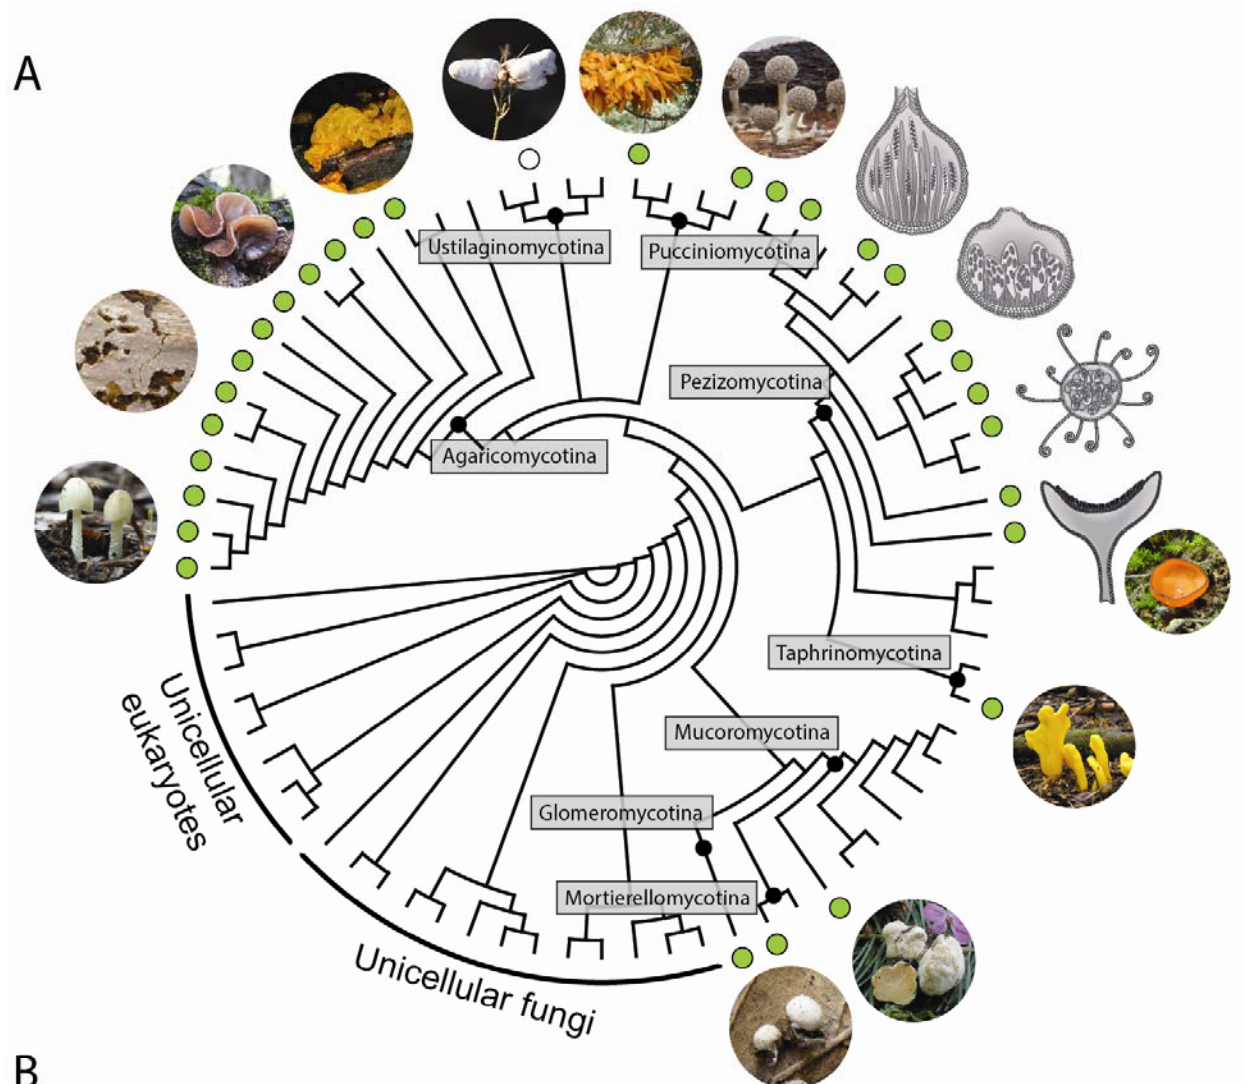

**B**

| Complex multicellular lineage | Classification                   | Type of complex multicellular structures                                                                  | Estimated # CMC species |
|-------------------------------|----------------------------------|-----------------------------------------------------------------------------------------------------------|-------------------------|
| Agaricomycotina               | Basidiomycota                    | Sexual fruiting bodies, sclerotia                                                                         | >20,000                 |
| Pezizomycotina                | Ascomycota                       | Sexual fruiting bodies, asexual fruiting bodies (coremium, sporodochium, pycnidium, acervulus), sclerotia | >32,000                 |
| Pucciniomycotina              | Basidiomycota                    | Sexual and asexual fruiting bodies (pycnium, aecium)                                                      | 8,400 <sup>1</sup>      |
| Ustilaginomycotina            | Basidiomycota                    | Fungal galls on host plants                                                                               | 1,700 <sup>1</sup>      |
| Endogonales                   | Mucoromycota/Mucoromycotina      | Underground truffle-like sexual fruiting bodies                                                           | 25                      |
| <i>Neolecta</i>               | Ascomycota/Taphrinomycotina      | Tongue-like sexual fruiting bodies                                                                        | 3                       |
| <i>Glomus spp.</i>            | Mucoromycota/Glomeromycotina     | Underground truffle-like sexual fruiting bodies                                                           | 1-10                    |
| <i>Modicella</i>              | Mucoromycota/Mortierellomycotina | Stalked/globular sexual fruiting bodies                                                                   | 2                       |

1051  
 1052 Figure 1. The phylogenetic distribution of complex multicellularity in fungi. **A.** Most typical  
 1053 complex multicellular morphologies of sexual fruiting bodies are shown for each major clade of

1054 fungi. Species pictured from left to right are: *Bolbitius titubans*, *Gloeocystidiellum sp*, *Auricularia*  
1055 *auricula-judae*, *Tremella mesenterica*, *Testicularia cyperi*, *Gymnosporangium clavariiforme*,  
1056 *Phleogena faginea*, *Podospora anserina* (perithecium), *Mycosphaerella sp.* (pseudothecium),  
1057 *Microspheara sp.* (cleistothecium), *Peziza sp* (apothecium), *Neolecta irregularis*, *Endogone*  
1058 *flammirocona*, *Modicella reniformis*. Green dots indicate lineages with known complex  
1059 multicellular representatives; an empty circle at the Ustilaginomycotina refers to the uncertain  
1060 status of the galls produced by *Testicularia* and allies. **B.** Classification, types of complex  
1061 multicellular structures produced and estimated number of complex multicellular species for  
1062 each major lineage of complex multicellular fungi. See acknowledgements for sources of  
1063 images.  
1064

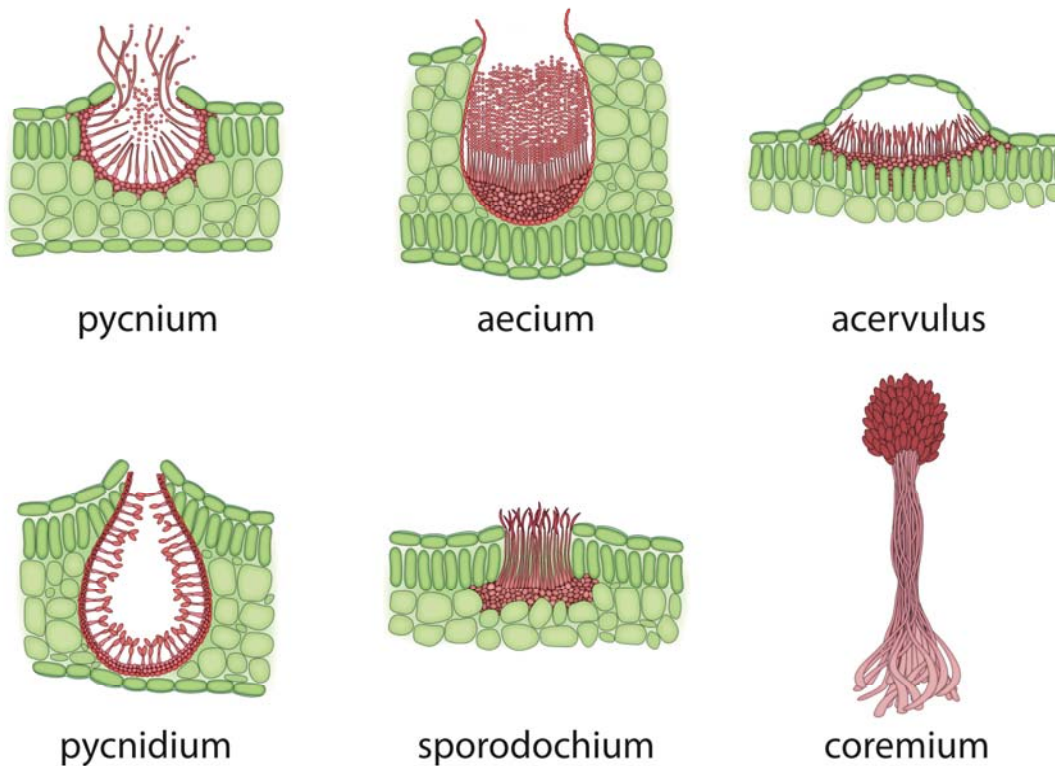

1065  
1066 Figure 2. Asexual complex multicellular structures produced by fungi in the Pucciniomycotina  
1067 (pycnium, aecium) and Ascomycota (acervulus, pycnidium, sporodochium, coremium =  
1068 synnemata). Note that these structures, like all complex multicellular structures, have a

1069 genetically determined shape and size and a tightly integrated developmental program. Plant  
1070 tissue shaded green.

1071

1072

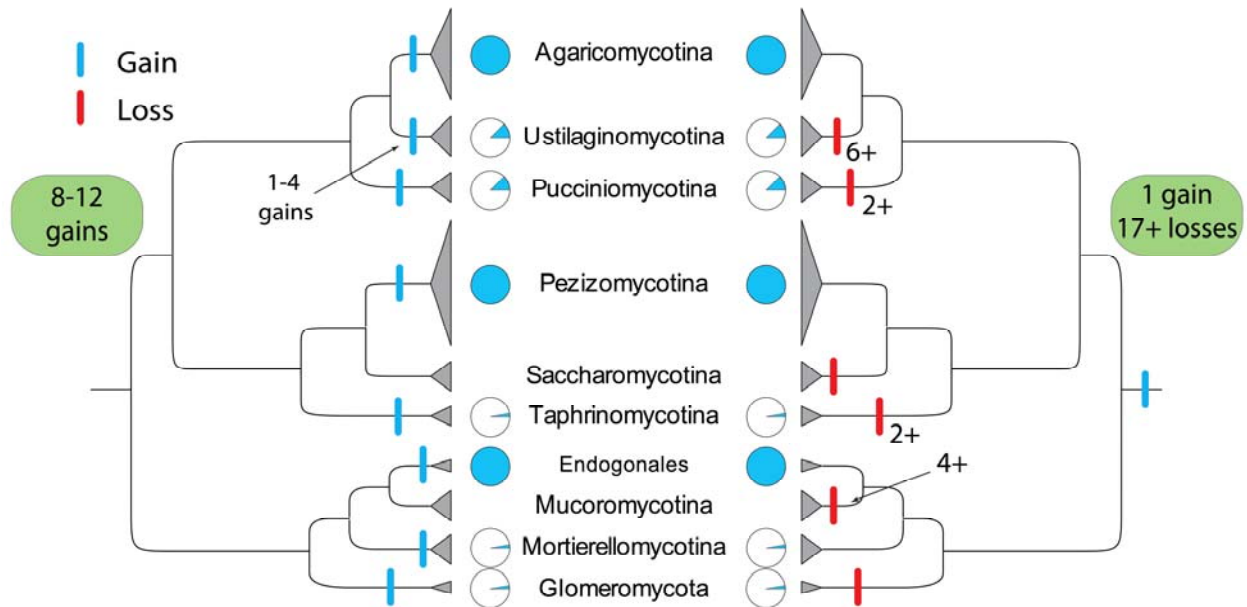

1073

1074 Figure 3. Alternative phylogenetic models for the recurrent origins of complex multicellularity in  
1075 fungi. Gains and losses of complex multicellularity across fungi under two contrasting models  
1076 are shown by vertical blue and red bars, respectively. Phylogenetically, the model implying  
1077 convergence requires 8-12 independent origins to explain the phylogenetic distribution of  
1078 complex multicellular fungi, whereas a model implying a single origin required 1 gain and >17  
1079 losses. Clades containing complex MC species are marked by pie charts with the blue section  
1080 corresponding to the estimated fraction of complex multicellular species.

1081

1082

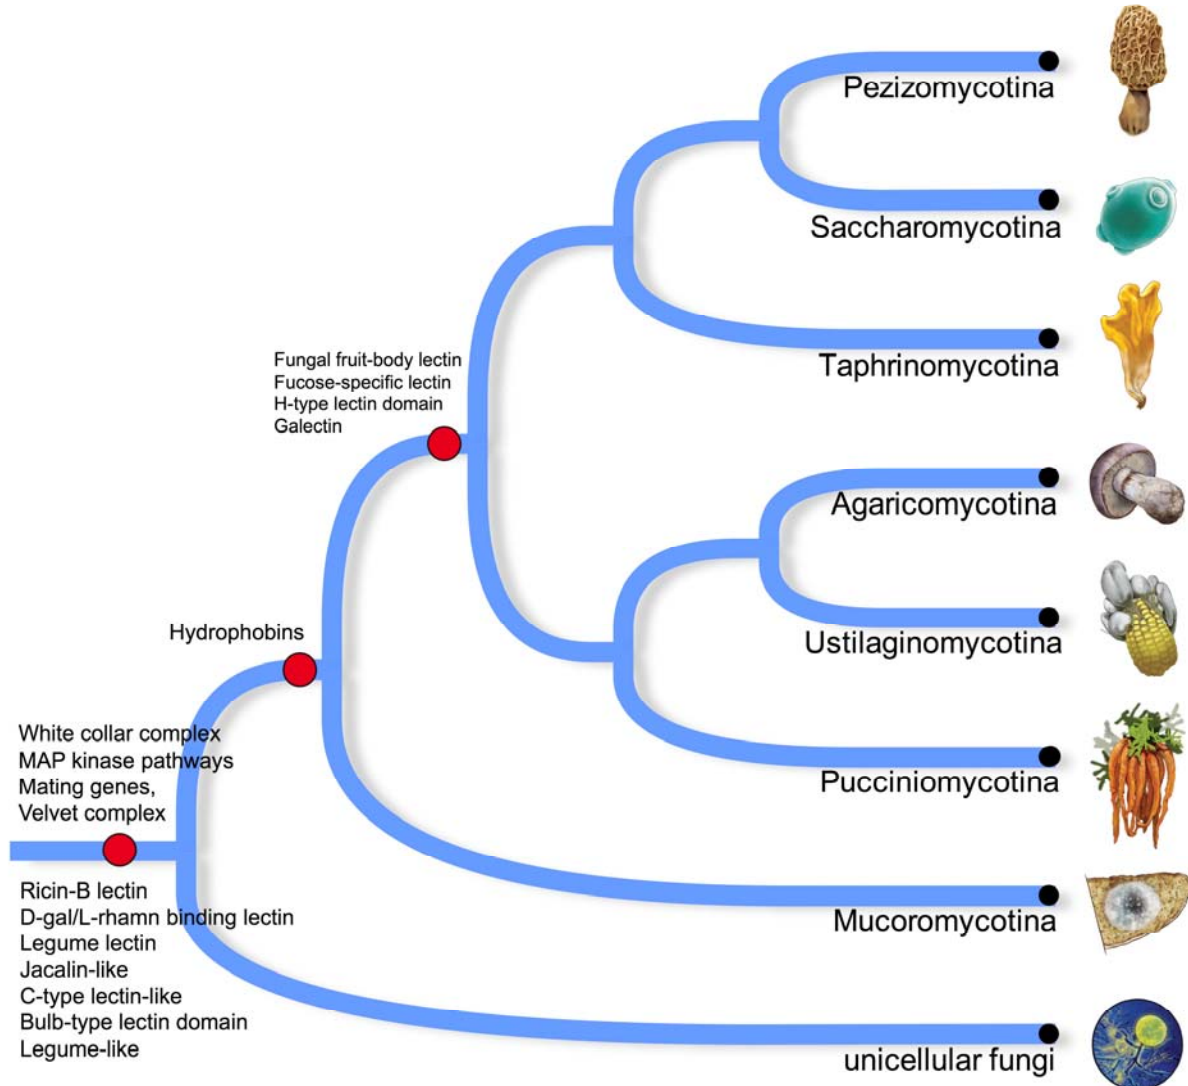

1083

1084 Figure 4. The conservation of characteristic gene families related to complex multicellularity in  
1085 fungi. Several gene families involved in cell adhesion, defense, fruiting body initiation and  
1086 morphogenesis are conserved across fungi, suggesting that the genetic prerequisites for  
1087 multicellular functioning are widely available in uni- and simple multicellular fungi. Note that the  
1088 emergence of most families predates the divergence of major clades of complex multicellular  
1089 fungi, including the largest clades Pezizomycotina and Agaricomycotina.

1090

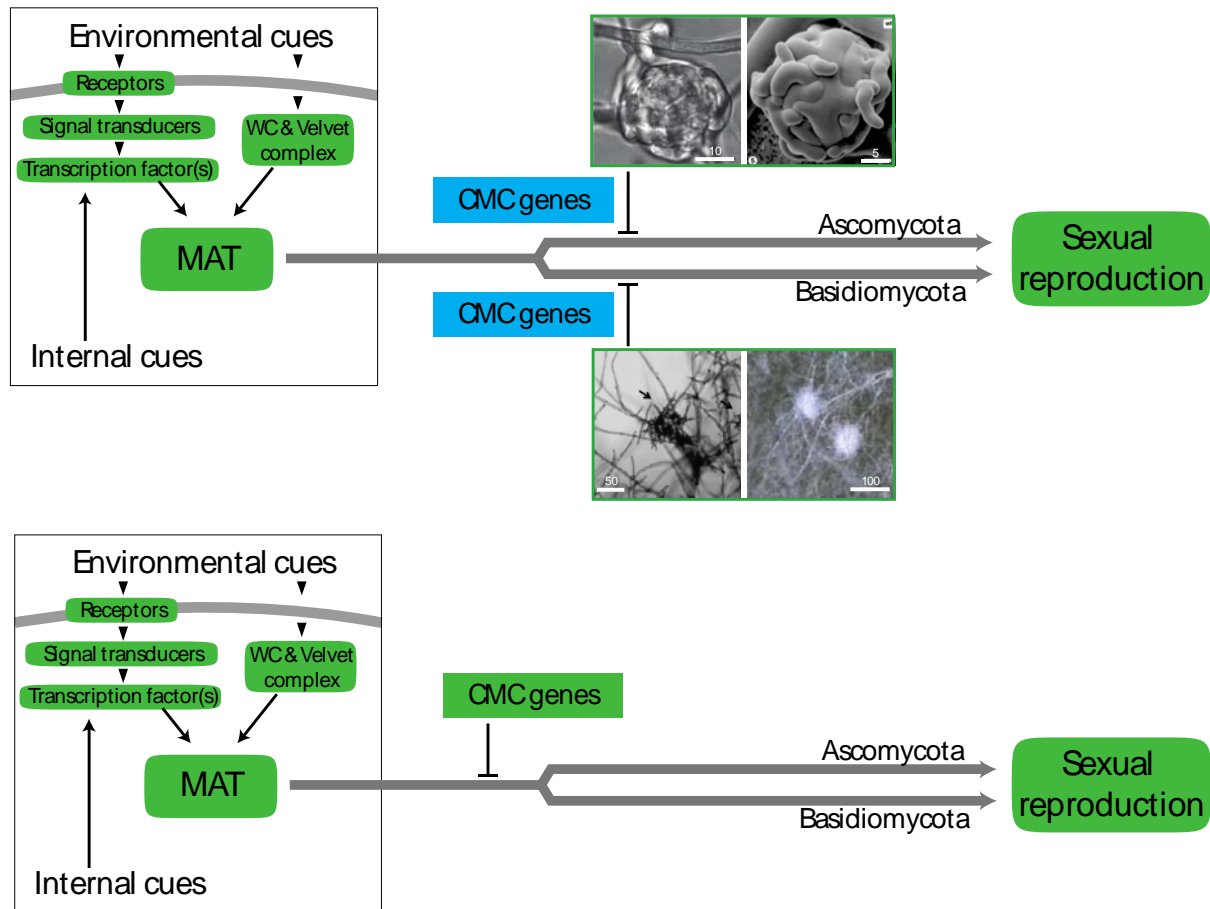

1091  
 1092 Figure 5. Two major alternative hypotheses for the evolution of complex multicellularity in fungi  
 1093 illustrated using a simplified case comprising Asco- and Basidiomycota. The initiation and  
 1094 trajectory of sexual reproduction in fungi comprises universally conserved mechanisms  
 1095 (highlighted in green). Genetic circuits involved in the development of fruiting bodies therefore  
 1096 should be linked into these conserved developmental pathways. A central question from the  
 1097 perspective of the evolution of fungal multicellularity is how genetic mechanisms of fruiting body  
 1098 development are linked to conserved circuits of sexual reproduction. The convergent origins  
 1099 model (top) implies that genetic mechanisms for fruiting body morphogenesis evolved  
 1100 independently along all lineages of complex multicellular fungi, whereas a single origin model  
 1101 (bottom) implies that at least part of the genetic toolkit of fruiting body development arose before  
 1102 the divergence of complex multicellular lineages. The presence of such genetic circuitries may  
 1103 predispose fungi for recurrently evolving complex multicellularity. The earliest complex  
 1104 multicellular stages, protoperithecia and primary hyphal knots for the Asco- and Basidiomycota



1105 are shown on the top image, respectively. Image sources are from Lord and Read (2010),  
 1106 Mayrhofer et al (2006), Lakkireddy et al (2011).  
 1107

1108 Table 2. Published high-throughput gene expression studies of fungal multicellular development

| Model species                                         | Classification | Reference                                     | Year | Technology used    |
|-------------------------------------------------------|----------------|-----------------------------------------------|------|--------------------|
| <i>Agaricus bisporus</i>                              |                | Morin et al. PNAS 109: 17501-17506            | 2012 | RNA-Seq (Illumina) |
| <i>Antrodia cinnamomea</i>                            |                | Lu et al PNAS 111: E4743–E4752                | 2014 | RNA-Seq (Illumina) |
| <i>Armillaria ostoyae</i>                             |                | Sipos et al Nat. Ecol. Evol. 1: 1931-1941.    | 2017 | RNA-Seq (Illumina) |
| <i>Auricularia polytricha</i>                         |                | Zhou et al. PLoS ONE 9: e91740.               | 2013 | RNA-Seq (Illumina) |
| <i>Coprinopsis cinerea</i>                            |                | Cheng et al. BMC Genomics 14:195              | 2013 | 5' SAGE            |
|                                                       | BASIDIOMYCOTA  | Muraguchi et al. PLoS ONE 10: e0141586.       | 2015 | RNA-Seq (Illumina) |
|                                                       |                | Plaza et al. BMC Genomics 15:492              | 2014 | RNA-Seq (SOLiD)    |
| <i>Flammulina velutipes</i>                           |                | Park et al. PLoS ONE 9: e93560.               | 2014 | RNA-Seq (Illumina) |
| <i>Hypsizygus marmoreus</i>                           |                | Zhang et al PLoS ONE 10: e0123025             | 2016 | RNA-Seq (Illumina) |
| <i>Lentinula edodes</i>                               |                | Wang et al. Gene 641: 326-334                 | 2018 | RNA-Seq (Illumina) |
| <i>Pleurotus touliensis</i>                           |                | Fu et al. Scientific Reports 7:9266           | 2017 | RNA-Seq (Illumina) |
| <i>Schizophyllum commune</i>                          |                | Ohm et al. Nat Biotechnol. 28:957-63          | 2010 | 5'-SAGE            |
|                                                       |                | Ohm et al. 81, Mol. Microbiol. 6: 1433–1445   | 2011 | RNA-Seq (Illumina) |
| <i>Termitomyces heimii</i>                            |                | Rahmad et al. Biol. Res. 47                   | 2014 | MADLI TOF          |
| <i>Ustilago maydis</i>                                |                | Leon-Ramirez et al. FGB 101:34-45             | 2017 | Microarray         |
| <i>Fusarium graminearum</i>                           |                | Son et al. PLoS One. 2016; 11: e0155671.      | 2016 | RNA-Seq (Illumina) |
| <i>Fusarium graminearum, F. verticilloides</i>        |                | Rani-Sikhakolli et al. FGB 49:663-673         | 2012 | RNA-Seq (Illumina) |
| <i>Ophiocordyceps sinensis</i>                        | ASCOMYCOTA     | Xiang et al. Genomics 103: 154-159            | 2014 | RNA-Seq (454)      |
| <i>Neurospora crassa</i>                              |                | Wang et al <i>Eukaryotic Cell.</i> 13:154-169 | 2014 | RNA-Seq (Illumina) |
| <i>Neurospora crassa, N. tetrasperma, N. discreta</i> |                | Lehr et al. PLoS ONE 9: e110398.              | 2014 | RNA-Seq (Illumina) |
| <i>3 Neurospora, 2</i>                                |                | Trail et al. PLoS Genet                       | 2017 | RNA-Seq            |



|                            |                           |      |                                      |
|----------------------------|---------------------------|------|--------------------------------------|
| <i>Fusarium spp.</i>       | 13: e1006867.             |      | (Illumina)                           |
| <i>Pyronema confluens</i>  | Traeger et al. PLoS Genet | 2013 | RNA-Seq<br>(Illumina)                |
|                            | 9: e1003820.              |      |                                      |
| <i>Sordaria macrospora</i> | Teichert et al. BMC       | 2012 | Single-cell<br>RNA-Seq<br>(Illumina) |
|                            | Genomics 13: 511          |      |                                      |

---

1109

1110
